# Supplementary material
Source: PubMed Central journal article supplement (PMC9715495)
Supplement: mmc1.pdf [file mmc1.pdf]

# Air Pollution and Meteorology as Risk Factors for COVID-19 Death in a Cohort from Southern California

## ONLINE DATA SUPPLEMENT

### Table of Contents

|      |                                                                   |    |
|------|-------------------------------------------------------------------|----|
| I.   | Kaiser Permanente Southern California Cohort and Health Data..... | 2  |
|      | KPSC Cohort Health Data Ascertainment.....                        | 2  |
|      | Elixhauser Disease Categories Employed .....                      | 2  |
| II.  | Chemical Transport Model .....                                    | 2  |
|      | Meteorological Model.....                                         | 3  |
|      | Emission Inventories.....                                         | 3  |
| III. | Bias Correction.....                                              | 5  |
| IV.  | Chemical Transport Model Results.....                             | 7  |
| V.   | Confounder Analysis.....                                          | 18 |
| VI.  | Unadjusted hazard ratios.....                                     | 20 |
| VII. | Stratification Analyses .....                                     | 22 |
|      | Stratification by sex .....                                       | 23 |
|      | Stratification by number of disease categories .....              | 28 |
|      | Stratification by age .....                                       | 35 |
|      | Stratification by tertile .....                                   | 41 |

### Table of Tables

|          |                                                                                                                                                                                   |    |
|----------|-----------------------------------------------------------------------------------------------------------------------------------------------------------------------------------|----|
| Table 1. | Spatial surrogates used to downscale 4km ARB area emissions to 1km. ....                                                                                                          | 4  |
| Table 2: | Data sources used for traffic surrogates .....                                                                                                                                    | 5  |
| Table 3: | Confounders identified for each exposure based on the 10% change in the pollution coefficient selection rule where FALSE indicates not selected and TRUE indicates selected ..... | 19 |
| Table 4: | Unadjusted hazard ratios .....                                                                                                                                                    | 20 |
| Table 5: | Fully adjusted hazard ratios reported by interquartile range.....                                                                                                                 | 20 |
| Table 6: | Stratification by sex.....                                                                                                                                                        | 23 |
| Table 7: | Stratification by number of disease categories.....                                                                                                                               | 28 |
| Table 8: | Stratification by age .....                                                                                                                                                       | 35 |

### Table of Figures

|            |                                                                                                                                                                                         |    |
|------------|-----------------------------------------------------------------------------------------------------------------------------------------------------------------------------------------|----|
| Figure 1:  | Summary of performance statistics for PM <sub>2.5</sub> mass after bias correction.....                                                                                                 | 6  |
| Figure 2:  | Locations of PM <sub>2.5</sub> mass monitoring sites around the central portion of the study domain that contains the majority of the study population.....                             | 7  |
| Figure 3:  | Time series of predicted (solid line) vs. measured (dots) monthly-average PM <sub>2.5</sub> concentrations at measurement locations in Los Angeles County. . ....                       | 8  |
| Figure 4:  | Time series of predicted (solid line) vs. measured (dots) monthly-average PM <sub>2.5</sub> concentrations at measurement locations in Orange County and San Diego County. ....         | 9  |
| Figure 5:  | Time series of predicted (solid line) vs. measured (dots) monthly-average PM <sub>2.5</sub> concentrations at measurement locations in Riverside County and San Bernardino County. .... | 10 |
| Figure 6:  | Time series of predicted (solid line) vs. measured (dots) monthly-average PM <sub>2.5</sub> concentrations at measurement locations in Kern County and Ventura County. ....             | 11 |
| Figure 7:  | Predicted O <sub>3</sub> max exposure fields during four seasons in the year 2016. ....                                                                                                 | 13 |
| Figure 8:  | Predicted PM <sub>2.5</sub> mass exposure fields during four seasons in the year 2016. ....                                                                                             | 14 |
| Figure 9:  | Predicted PM <sub>2.5</sub> elemental carbon (EC) exposure fields during four seasons in the year 2016. ....                                                                            | 15 |
| Figure 10: | Predicted PM <sub>2.5</sub> nitrate exposure fields during four seasons in the year 2016. ....                                                                                          | 16 |
| Figure 11: | Predicted diesel primary PM <sub>2.5</sub> mass exposure fields during four seasons in the year 2016. <sup>3</sup> .....                                                                | 17 |
| Figure 12: | Predicted PM <sub>0.1</sub> mass exposure fields during four seasons in the year 2016. ....                                                                                             | 18 |
| Figure 13: | Stratification of significant pollutants by tertile, controlled by temperature and humidity.....                                                                                        | 43 |

## I. Kaiser Permanente Southern California Cohort and Health Data

### KPSC Cohort Health Data Ascertainment

We defined COVID-19 hospitalizations as those occurring within 21 days of a COVID-19 diagnosis or positive test. Hospitalizations lasting fewer than 24 hours were excluded and transfers from non-KP hospitals to KP hospitals were consolidated into a single hospitalization. Data sources include internal data sources, including KPSC hospital, clinic and emergency department data, and the California state death master files and Social Security Administration Death Master files. Data are cleaned and scored for accuracy using a proprietary algorithm.

### Elixhauser Disease Categories Employed

Five broad comorbidity categories were created to identify co-morbidities that may increase a person's risk of a severe COVID-19 outcomes.<sup>1,2</sup> We use Elixhauser disease categories to create COVID-19 relevant disease categories. The Elixhauser comorbidity index aggregates diagnoses into 23 disease categories. The Elixhauser comorbidity index sums the number of disease categories that a patient was diagnosed with to measure the burden of multiple morbidities. It was originally developed to predict mortality among hospitalized patients by aggregating the following Elixhauser co-morbidity categories: "Cardiovascular diseases" includes Elixhauser's Congestive Heart Failure, Cardiac Arrhythmia, Valvular Disease, Pulmonary Circulation Disorders, and Peripheral Vascular Disorders; "Pulmonary disease" including Elixhauser's Chronic Pulmonary Disease; "Hypertension" including Elixhauser's Hypertension uncomplicated and complicated;" "Diabetes" including Elixhauser comorbidities Diabetes with and without chronic complications; and the remainder of the Elixhauser comorbidities were grouped into a residual category named "other". We further combined the four specific categories into a count of COVID-19 relevant disease categories that would allow us to stratify our analysis by chronic-disease burden.

## II. Chemical Transport Model

Simulations for the year 2016 were carried out across California using the source-oriented UC Davis-California Institute of Technology (UCD-CIT) regional air quality model. The UCD/CIT airshed model is a reactive 3-D CTM that predicts the evolution of gas and particle phase pollutants in the atmosphere in the presence of emissions, transport, deposition, chemical reaction, and phase change as represented by Eq. (1)

### Equation 1

$$\frac{\partial C_i}{\partial t} + \nabla \cdot u C_i = \nabla K \nabla C_i + E_i - S_i + R_i^{gas}(C) + R_i^{part}(C) + R_i^{phase}(C)$$

where  $C_i$  is the concentration of gas or particle phase species  $i$  at a particular location as a function of time  $t$ ,  $u$  is the wind vector,  $K$  is the turbulent eddy diffusivity,  $E_i$  is the emissions rate,  $S_i$  is the loss rate,  $R_i^{gas}$  is the change in concentration due to gas-phase reactions,  $R_i^{part}$  is the change in concentration due to particle-phase reactions and  $R_i^{phase}$  is the change in concentration due to phase change.<sup>3</sup> Loss rates include both dry and wet deposition. Phase change for inorganic species occurs using a kinetic treatment for gas-particle conversion<sup>4</sup> driven towards the point of thermodynamic equilibrium.<sup>5</sup> Phase change for organic species is also treated as a kinetic process with vapor pressures of semi-volatile organics calculated using the 2-product model.<sup>6</sup>

The basic capabilities of the UCD/CIT model are similar to the CMAQ model maintained by the U.S. EPA, but the UCD/CIT model has several source apportionment features and more particle size resolution, which makes it attractive for the current project. The UCD/CIT model explicitly tracks the mass and the number concentration of particles in 15 discrete size bins spanning the range from 10 nm through 10  $\mu$ m, with tracer species used to quantify source contributions to the primary particle mass in each bin. A moving sectional bin approach is used<sup>7</sup> so that particle number and mass can be explicitly conserved with particle diameter acting as the dependent variable.

The emissions of particle source tracers are empirically set to be 1% of the total mass of primary particles emitted from each source category, so they do not significantly change the particle radius and the dry deposition rates. For a given source, the simulated concentration of artificial tracer directly correlates with the amount of PM mass emitted from that source in that size bin. The corresponding number concentration attributed to that source can be calculated using Eq. (2)

### Equation 2

$$num_i = \frac{tracer_i \times 100}{\frac{\pi}{6} D_p^3 \rho} \quad (\text{eq Equation 2})$$

where  $tracer_i$  represents the artificial tracer mass in size bin  $i$ ,  $D_p$  is the core particle diameter, and  $\rho$  is the core particle density. Core particle properties are calculated by removing any condensed species to better represent the properties of the particles when they were emitted. More details describing the source apportionment technique in UCD/CIT model are provided in previous studies.<sup>8-12</sup>

A total of 50 particle-phase chemical species are included in each size bin. Gas-phase concentrations of oxides of nitrogen (NO<sub>x</sub>), volatile organic compounds (VOCs), oxidants, ozone, and semi-volatile reaction products were predicted using the SAPRC-11 chemical mechanism.<sup>13</sup> Phase change for inorganic species occurs using a kinetic treatment for gas-particle conversion<sup>4</sup> driven towards the point of thermodynamic equilibrium.<sup>5</sup> Phase change for organic species is also treated as a kinetic process with vapor pressures of semi-volatile organics calculated using the 2-product model.<sup>6</sup>

UCD/CIT model calculations were carried out using three nested model domains with 24 km, 4 km, and 1 km horizontal spatial resolution over the study domain. Sixteen telescoping levels were used in the vertical dimension with a thickness of 30 m at ground level and 1000 m at the top height of 5 km.

### Meteorological Model

Hourly meteorology inputs to drive the regional chemical transport model at 24-km, 4-km, and 1-km resolution in the year 2016 were simulated using the Weather Research and Forecasting (WRF) v3.4 model ([www.wrf-model.org](http://www.wrf-model.org)). WRF model vertical resolution was 31 vertical layers from the ground level to the top pressure of 100 hPa. Initial and boundary conditions for meteorological simulations were taken from North American Regional Reanalysis (NARR), which has a spatial resolution of 32 km and a temporal resolution of 3 h. The Yonsei University (YSU) boundary layer vertical diffusion scheme<sup>14</sup> and Pleim-Xiu land surface scheme<sup>15</sup> were adopted in this study. Four-dimensional data assimilation was applied to anchor the model predictions to observed meteorological patterns.

### Emission Inventories

The year 2016 area source and point source emission inventories used in the current study were provided by the California Air Resources Board with several modifications. Because fugitive dust emissions were replaced by an online dust model<sup>16</sup> based on the wind speed, and soil moisture predicted by the WRF model. This change corrects the positive bias in dust emissions and PM<sub>2.5</sub> mass noted by Hu et al.<sup>17,18</sup> A major point source of unpaved road dust at MAGTFTC/MCAGCC Twentynine Palms military facility in San Bernardino County was converted to an area sources over a 9 km<sup>2</sup> region around the base. Food cooking emissions in GAI 6069 (Victorville in San Bernardino County) were reduced by a factor of three so that the per capita emissions from food cooking activities were similar to those in Los Angeles County.

Area source emissions inventories provided by CARB had spatial resolution of 4-km. Area source emissions with spatial resolution of 1-km were created for major sources using spatial surrogates processed with the “Spatial Allocator” software maintained by U.S. EPA. *Table 1* summarizes all surrogates used to downscale 4km ARB area emissions to 1km, accounting for 80% of the statewide area source emissions.

Table 1. Spatial surrogates used to downscale 4km ARB area emissions to 1km.

| Surrogate | Description                              | Data Source                                                        |
|-----------|------------------------------------------|--------------------------------------------------------------------|
| 302       | Industrial-related/industrial employment | see details in reference paper: DOI 10.1016/j.atmosenv.2020.117665 |
| 441       | Total population                         |                                                                    |
| 587       | Off-road construction equipment          |                                                                    |
| 588       | On-road construction equipment           |                                                                    |
| 621       | Service & Commercial employment          |                                                                    |
| 651       | Single-family housing                    |                                                                    |
| 720       | Farm road VMT                            |                                                                    |
| 190       | Forestland                               | California Air Resource Board (CARB) provided                      |
| 530       | Residential Gas Heating                  |                                                                    |
| 660       | Unpaved road                             |                                                                    |
| 100       | All airports                             |                                                                    |
| 140       | Commercial airports                      |                                                                    |
| 382       | Military airports                        |                                                                    |
| 610       | Secondary paved road                     |                                                                    |
| 480       | Primary Road                             | Tiger/Line shapefile, S1100 + S1200                                |
| 570       | Residential heating – wood               | California Air Resource Board (CARB) shapefile                     |
| 560       | Restaurants                              | Food service market dataset from ESRI (NACIS 7225)                 |

### Mobile Source Emissions

Three spatial surrogates were created to downscale mobile emissions to 1 km resolution, including gasoline mobile, diesel mobile, and tire/brake wear. Explicit traffic counts collected by the U.S. Highway Performance Monitoring System (HPMS) were used to distribute the majority of the tailpipe emissions to highways and other principal arterial roads. MacDonald et al.<sup>19</sup> showed that ~70% of gasoline and ~80% of diesel vehicle fuel consumption in California occurs on roads with traffic count information. Emissions on these roads can be represented by VMT (i.e., traffic count x road length). The remaining ~30% of gasoline and ~20% of diesel vehicle activity can use road length as a spatial surrogate. This approximate treatment for the residual portion of the tailpipe emissions was done separately for urban and rural areas to ensure rural emissions were not overestimated.<sup>20</sup> 90% of the unmonitored gasoline and diesel activity occurs in urban areas, with the balance in rural areas. The final mobile gasoline and diesel surrogates were calculated using the equations:

$$\begin{aligned} \text{Gasoline mobile surrogate} = & 70\% \times (\text{AADT} \times \text{road length})_{\text{normalized}} + \\ & 30\% \times (\text{road length without traffic counts})_{\text{normalized}} \end{aligned}$$

$$\begin{aligned} \text{Diesel mobile surrogate} = & 80\% \times (\text{Truck AADT} \times \text{road length})_{\text{normalized}} + \\ & 20\% \times (\text{truck road length without traffic counts})_{\text{normalized}} \end{aligned}$$

$$(\text{Truck}) \text{ Road length without traffic counts} = 90\% \times \text{urban road length} + 10\% \times \text{rural road length}$$

Tire and brake wear emissions were estimated as a fixed fraction of tailpipe emissions for all engine types. The 2016 CARB emissions inventories<sup>21</sup> specify that gasoline/diesel emissions account for 86% / 14% of total mobile emissions. Thus, the tire and brake wear spatial surrogate was calculated using the equation:

$$\begin{aligned} \text{Tire \& brake wear surrogate} \\ = & 86\% \times (\text{Diesel mobile surrogate})_{\text{normalized}} \\ & + 14\% \times (\text{Gasoline mobile surrogate})_{\text{normalized}} \end{aligned}$$

Data sources used for traffic surrogates are listed in Table 2.

Table 2: Data sources used for traffic surrogates

| Description                                                          | Data Source                                                                                                                                                                                                      |
|----------------------------------------------------------------------|------------------------------------------------------------------------------------------------------------------------------------------------------------------------------------------------------------------|
| Gasoline vehicle traffic count – Average Annual Daily Traffic (AADT) | <a href="https://www.fhwa.dot.gov/policyinformation/hpms/shapefiles.cfm">https://www.fhwa.dot.gov/policyinformation/hpms/shapefiles.cfm</a> , accessed August 2020                                               |
| Diesel vehicle traffic count – Truck AADT (with three or more axles) | Caltrans                                                                                                                                                                                                         |
| Road shapefiles                                                      | <a href="https://www.census.gov/geographies/mapping-files/time-series/geo/tiger-line-file.html">https://www.census.gov/geographies/mapping-files/time-series/geo/tiger-line-file.html</a> , accessed August 2020 |
| Truck road network can defined in the Freight Analysis Framework     | <a href="https://ops.fhwa.dot.gov/freight/freight_analysis/faf/">https://ops.fhwa.dot.gov/freight/freight_analysis/faf/</a> , accessed August 2020).                                                             |

### Soil NOx

Candidate soil NOx emissions were included in the calculations based on a biogeochemical model combined with fertilizer application rates.<sup>22</sup> Soil NOx emissions varied by month of the year based on the effects of temperature on the biogeochemical cycle. Sensitivity studies carried out across years between 2000 – 2015 indicate the inclusion of soil NOx emissions improves the accuracy of model predictions for gas phase ozone and particulate nitrate.<sup>23</sup>

### Biogenic Emissions

Biogenic emissions were generated using the Model of Emissions of Gases and Aerosols from Nature (MEGANv2.1) based on the meteorological fields generated using the WRF model. The gridded geo-referenced emission factors and land cover variables required for MEGAN calculations were created using the MEGANv2.1 pre-processor tool and the ESRI\_GRID leaf area index and plant functional type files available at the Community Data Portal.<sup>24</sup>

### Wildfires

Daily values of wildfire emissions were generated using the Global Fire Emissions Database (GFED).<sup>25</sup> Wildfire emissions were assigned the same particle size and composition distribution as routine biomass combustion. Typical wildfire plumes rise to 6-10 km in the atmosphere depending on the intensity of the fire and the local meteorological conditions.<sup>26</sup> Wildfire plumes were injected at the top of the model domain at a height of approximately 5 km in the current simulations.

Wildfire emissions were represented using the Global Fire Emissions Database (GFED).<sup>27</sup> GFED uses satellite images of burned areas combined with vegetation maps to estimate smoke released each day during wildfires. Spatial resolution of GFED emissions inventories are 0.25 degrees. Smoke from these fires impacted cities throughout central California as plumes were trapped within the Central Valley. Wildfire emissions were assigned particle size and composition profiles based on measurements during biomass burning experiments.<sup>28</sup>

## III. Bias Correction

Predicted monthly-averaged PM<sub>2.5</sub> concentrations were compared to measured PM<sub>2.5</sub> concentrations at all available monitoring sites across the study domains for the entire duration of the study years 2016. Summary statistics were calculated to characterize CTM performance, including the correlation coefficient (R), mean fractional error (MFE), mean fractional bias (MFB), mean error (ME), mean bias (MB), and root mean square error. Because PM<sub>2.5</sub> predictions were moderately correlated with measured concentrations (R>0.5 at more than half the monitoring sites) but the predicted concentrations exceeded measured concentrations by a factor of approximately 50% (average MFB=0.549). This over-prediction is likely caused by an under-prediction of vertical mixing and dilution associated with the combination of updates to the WRF model v3.4 and the incorporation of non-local transport terms into the aerosol advection / diffusion algorithms.

The bias in CTM predictions at each monitoring location was combined with the CTM predicted concentrations of primary particles emitted from nine different source categories and the concentrations secondary nitrate and sulfate particulate matter to form a time-series that was analyzed using multi-linear regression (MLR) based on equation 3. An intercept was not considered in the regression equation under the assumption that any constant bias introduced by abnormally high boundary conditions or under-predicted wind speeds would manifest as over-predictions in the indicated particle metrics. An intercept (i.e. constant bias) would have the potential for overlap or “double counting” in the regression model formulation.

### Equation 3

$$\text{Bias} = a_1 * \text{Tracer1} + a_2 * \text{Tracer2} + \dots + a_9 * \text{Tracer9} + a_{10} * \text{Nitrate} + a_{11} * \text{Sulfate} + a_{12} * \text{Ammonium} \quad (\text{eq Equation 3})$$

Here  $a_i$  represents regression coefficients and  $\text{Tracer}_i$  represents the concentrations of primary particles emitted from: 1. On-road gasoline vehicles, 2. Offroad gasoline vehicles, 3. On-road diesel vehicles, 4. Offroad diesel vehicles, 5. Biomass combustion, 6. Food cooking, 7. Aircraft, 8. Natural gas combustion, and 9. All other sources. The time series from all 40 sites in the study domain were combined into a single dataset with 452 data points to support the twelve independent variables in the regression analysis. Multiple regression models were explored, with non-zero coefficients eventually selected for Tracer2, Tracer3, Tracer5, Tracer6, Tracer9, and inorganic ions. A single set of regression coefficients was able to explain the bias with an  $R^2=0.82$  and a regression slope of 0.92.

The MLR bias equation (eq 3) was applied at each CTM grid cell to predict the bias in CTM concentrations. The baseline CTM concentrations were then adjusted using the equation

### Equation 4

$$C^{\text{bias\_corr}} = C^{\text{baseline}} * (1 - \text{bias}/C^{\text{baseline}}) \quad (\text{eq Equation 4})$$

The corrected  $\text{PM}_{2.5}$  mass concentrations had a mean fraction bias of 0.181, significantly improving the accuracy of the exposure fields. Figure 1 illustrates the distribution of R and MFB values across the 40 monitoring sites in the study domain.

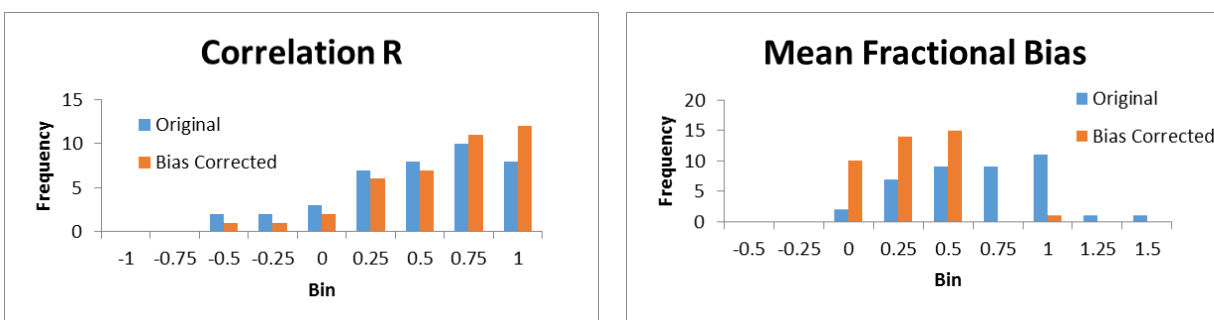

**Figure 1: Summary of performance statistics for  $\text{PM}_{2.5}$  mass after bias correction.** Ideal values are  $R=1$  and  $\text{MFB}=0$ .

Bias corrections were only applied to primary PM components emitted directly to the atmosphere in the particle phase. Concentrations of secondary PM components predicted by the CTM were not adjusted because the measurements at the limited number of speciation sites suggested that secondary components were not over-predicted to the same extent as total mass. Bias corrections also were not applied to gas-phase species such as  $\text{O}_3$  and  $\text{NO}_2$  because these species are formed from chemical reactions in the atmosphere that have a non-linear

dependence on atmospheric mixing in which increasing concentrations of some species such as NO can decrease concentrations of other species such as O<sub>3</sub>. The spatial pattern of the gas-phase concentrations should be approximately correct in the current analysis, but future studies should correct the mixing in the meteorological fields and repeat the CTM calculations to remove bias in all species.

#### IV. Chemical Transport Model Results

Figure 2 shows the location of PM<sub>2.5</sub> monitoring locations in the core of the study domain. Figure 3-Figure 6 show the time series of predicted PM<sub>2.5</sub> mass concentrations and measured concentrations across the counties within the study domain. Model predictions have been bias-corrected using the methods described in previous sections. Model predictions at most locations are generally in reasonable agreement with measured concentrations. Overall PM<sub>2.5</sub> predictions have a slight positive bias.

Figure 5c shows that predicted PM<sub>2.5</sub> concentrations are 2-4 times higher than measured values at the monitoring site near Victorville CA (population 121,902) in San Bernardino County. This over-prediction results from over-estimated emissions in this urban location. Food cooking emissions were scaled down to match per-capita values in Los Angeles County, but emissions from other area sources were not rescaled. Given the small population in Victorville, this isolated over-prediction in PM<sub>2.5</sub> concentrations should not have a large influence on study results.

Seasonal patterns in both predicted and measured PM<sub>2.5</sub> concentrations are modest. Most residences in the study region use natural gas or electricity for home heating during winter months, and so the much higher winter concentrations associated with residential wood combustion are generally absent at most sites except around Bakersfield (see for example Figure 6a,c,d). Modest increases in concentrations are observable in winter and summer months due to more stagnant atmospheric conditions compared to spring and fall months.

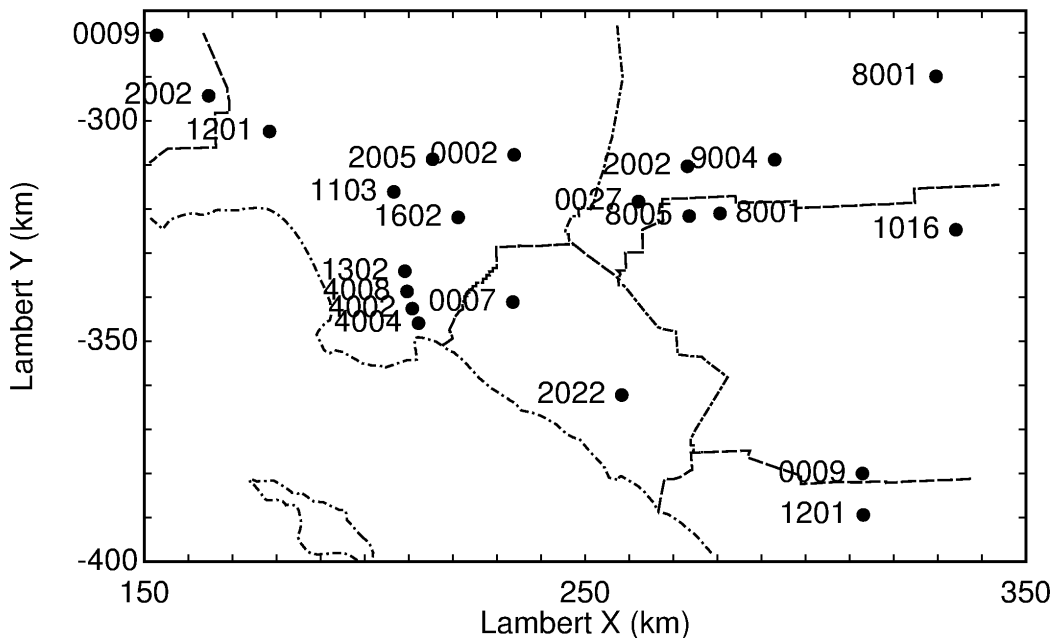

**Figure 2: Locations of PM<sub>2.5</sub> mass monitoring sites around the central portion of the study domain that contains the majority of the study population.** Full site codes shown in subsequent figures are preceded by the state identification number California=06 and the county FIPS code: Ventura=061, Los Angeles=037, Orange=059, San Diego=073, San Bernardino=071, Riverside=065.

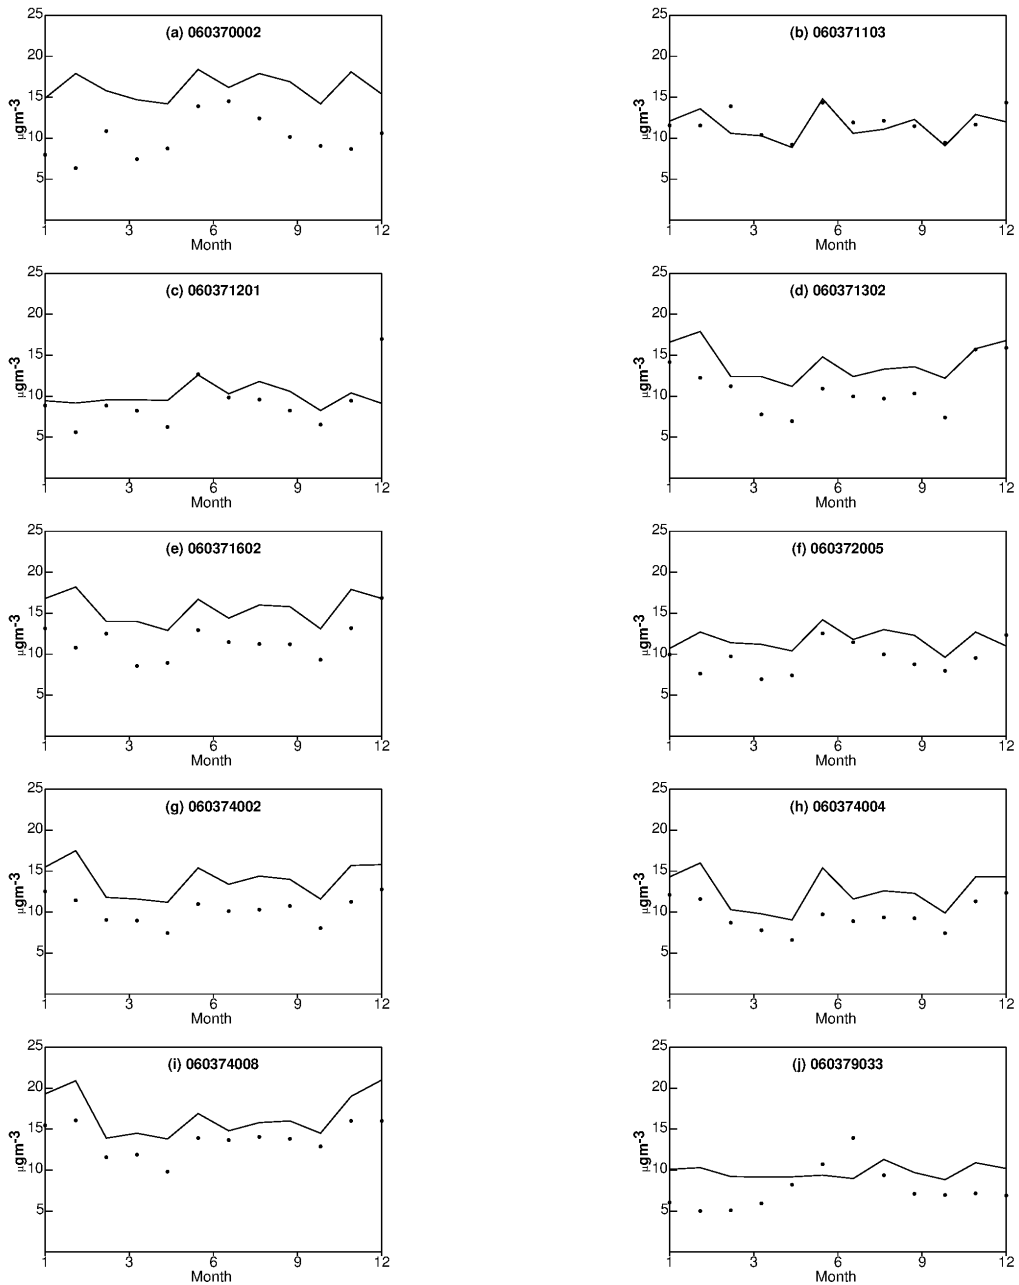

**Figure 3: Time series of predicted (solid line) vs. measured (dots) monthly-average PM<sub>2.5</sub> concentrations at measurement locations in Los Angeles County.** All model concentrations have been bias-corrected. Measurement site codes correspond to names designated by the U.S. EPA monitoring network.



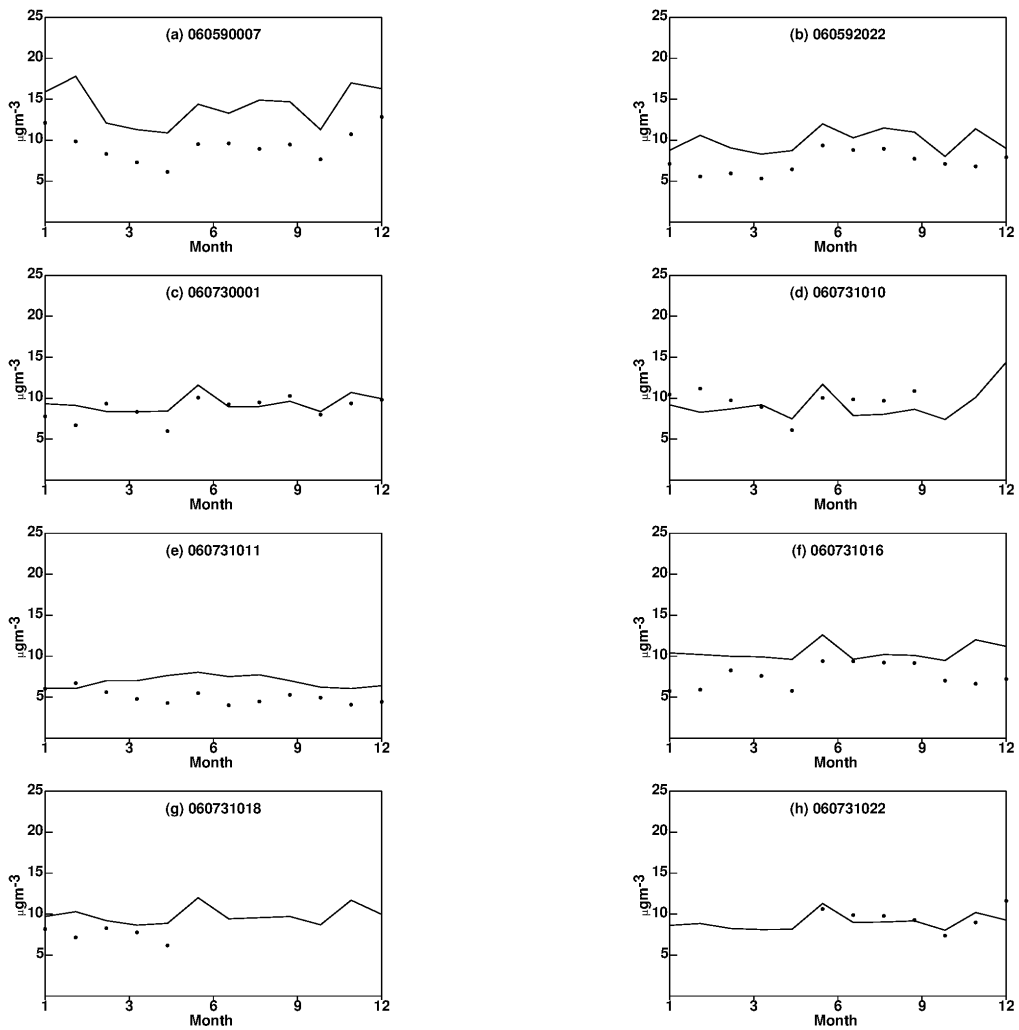

**Figure 4: Time series of predicted (solid line) vs. measured (dots) monthly-average PM<sub>2.5</sub> concentrations at measurement locations in Orange County and San Diego County. All model concentrations have been bias-corrected. Measurement site codes correspond to names designated by the US EPA monitoring network.**

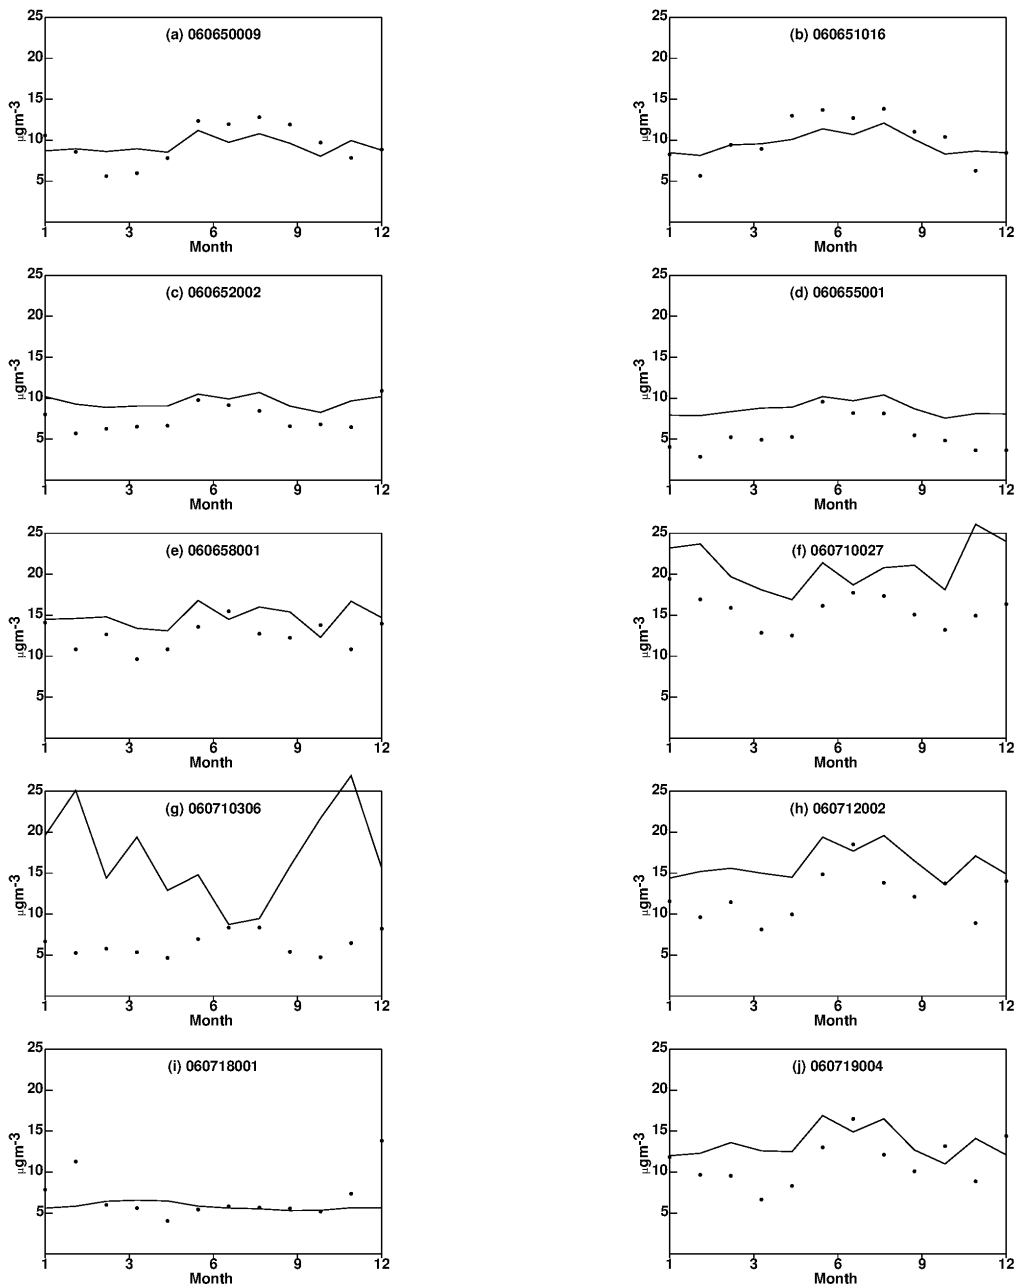

**Figure 5: Time series of predicted (solid line) vs. measured (dots) monthly-average PM<sub>2.5</sub> concentrations at measurement locations in Riverside County and San Bernardino County. All model concentrations have been bias-corrected. Measurement site codes correspond to names designated by the US EPA monitoring network.**

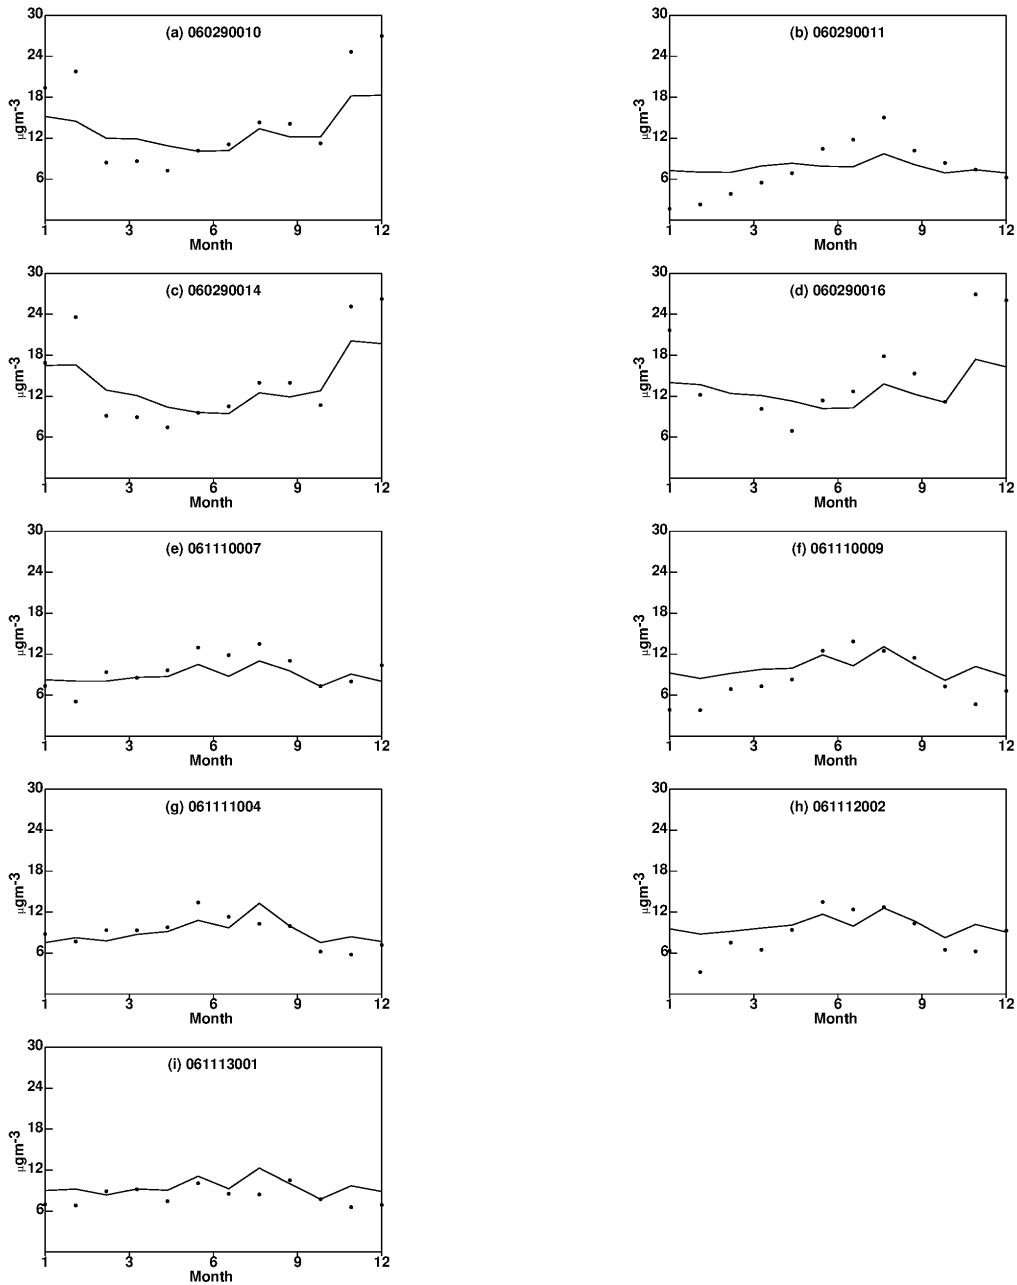

**Figure 6: Time series of predicted (solid line) vs. measured (dots) monthly-average PM<sub>2.5</sub> concentrations at measurement locations in Kern County and Ventura County.** All model concentrations have been bias-corrected. Measurement site codes correspond to names designated by the US EPA monitoring network.

Figure 7 displays the predicted ground-level daily maximum 1-hr average O<sub>3</sub> concentration averaged during each season of the year 2016. The scale in each sub-panel of Figure 7 is adjusted based on seasonal trends, with highest concentrations in the summer and lowest concentrations during the winter. O<sub>3</sub> concentrations generally increase moving from west to east (downwind) in the air basin. Maximum summer concentrations occur in the mountains north of Los Angeles where anthropogenic NO<sub>x</sub> emissions mix with biogenic VOC emissions leading to enhanced O<sub>3</sub> formation. As noted previously, gas-phase concentrations were not bias corrected in the current study, and so the concentrations displayed in Figure 7 may reflect errors associated with under-predicted wind speeds.

Figure 8 illustrates the predicted ground-level PM<sub>2.5</sub> mass exposure fields over the study domain during each season of the year 2016. The scale in Figure 8 has been adjusted to show concentrations over major population centers. The maximum predicted PM<sub>2.5</sub> concentrations over military airports (circled) are off-scale, but this does not significantly affect population-weighted exposures. Maximum PM<sub>2.5</sub> mass concentrations occur east of central Los Angeles in San Bernardino County. Elevated concentrations of PM<sub>2.5</sub> mass are also predicted to occur along major transportation corridors connecting the Port of Los Angeles and the Port of Long Beach with distribution centers in San Bernardino County.

Figure 9 illustrates the predicted ground-level PM<sub>2.5</sub> elemental carbon (EC) exposure fields over the study domain during each season of the year 2016. EC is a primary pollutant directly emitted from diesel engines and from gas direct injection (GDI) gasoline engines. The pattern of EC concentrations therefore follows major transportation corridors, with a maximum value once again occurring over distribution centers in San Bernardino County. Increased stagnation in the atmosphere during winter and summer months leads to higher EC concentrations compared to spring and fall months.

Figure 10 illustrates the predicted ground-level PM<sub>2.5</sub> nitrate concentrations over the study domain during each season of the year 2016. Nitrate is a secondary pollutant formed from atmospheric chemical reactions involving precursor NO<sub>x</sub> emissions. Regional nitrate patterns are generally more distributed than regional patterns of EC (compare Figure 2 vs. Figure 3). Maximum nitrate concentrations generally occur over a broad area east (downwind) of central Los Angeles. Concentrations are generally higher in the colder winter months because nitrate can evaporate in warmer months.

Figure 11 illustrates the predicted ground-level PM<sub>2.5</sub> concentrations associated with primary particulate matter emitted from on-road diesel engines. As expected, the spatial pattern generally follows major transportation corridors, with a noticeable maximum at distribution centers in San Bernardino County. The seasonal pattern of the primary on-road diesel particulate matter is similar to the season pattern for EC (see Figure 2).

Ultrafine particles with diameter less than 0.1 μm can be emitted directly (primary pollutant) or it can be formed in the atmosphere through either condensation or nucleation processes (secondary pollutant). The PM<sub>0.1</sub> concentration fields illustrated in Figure 12 show evidence of both pathways. Fall and winter concentrations are highest over distribution centers in San Bernardino County due to primary emissions from goods movement activities. PM<sub>0.1</sub> concentrations in the spring are highest over the Port of Los Angeles due to conversion of sulfur emissions to sulfuric acid that subsequently partitions to the particle phase. PM<sub>0.1</sub> concentrations during summer are highest in the foothills of the mountains to the north of Los Angeles where anthropogenic and biogenic emissions mix. Overall, the PM<sub>0.1</sub> mass exposure fields have the greatest seasonal variability of all the pollutants considered.

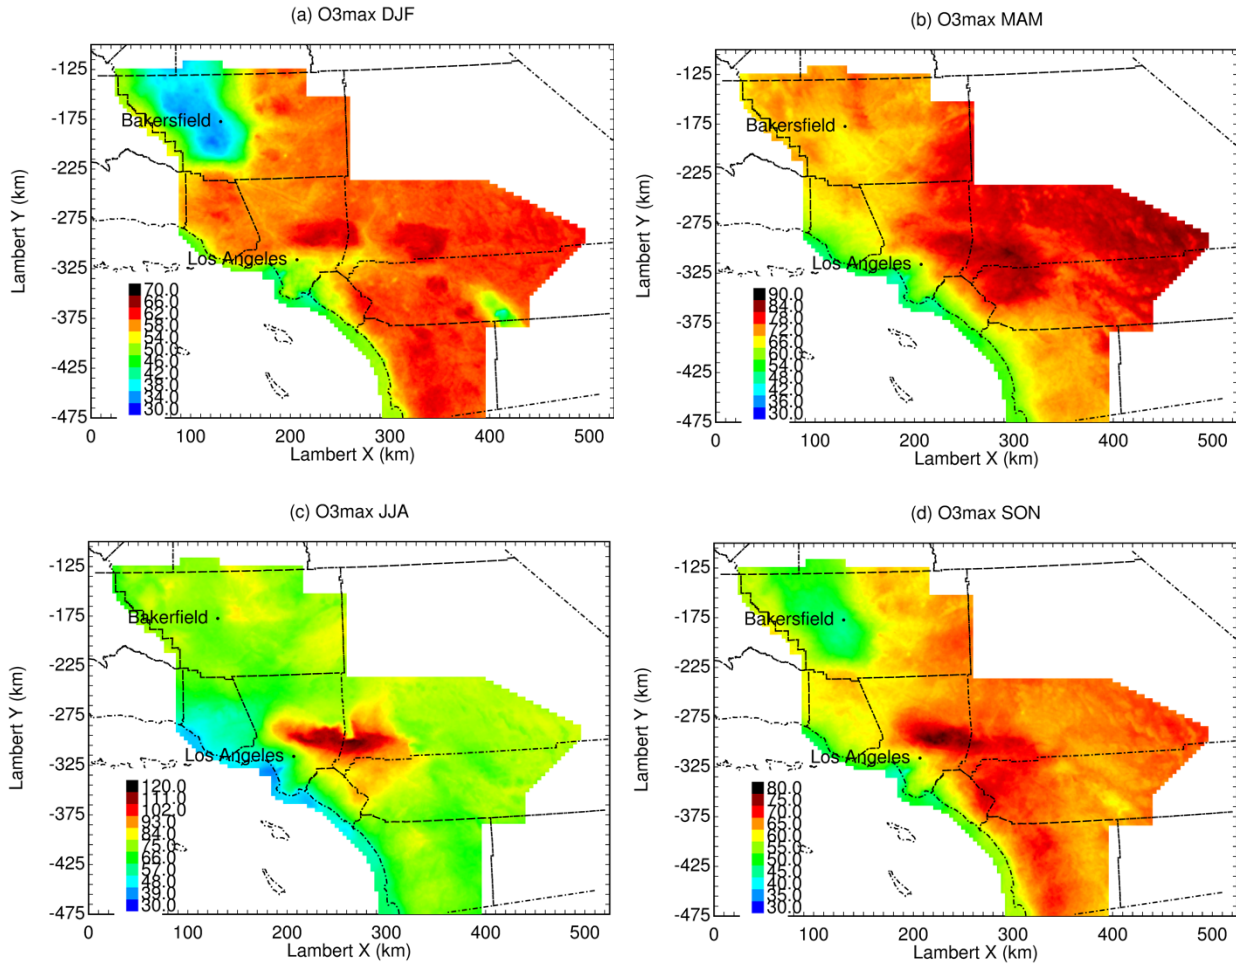

Figure 7: Predicted O3 max exposure fields during four seasons in the year 2016. All units ppb.

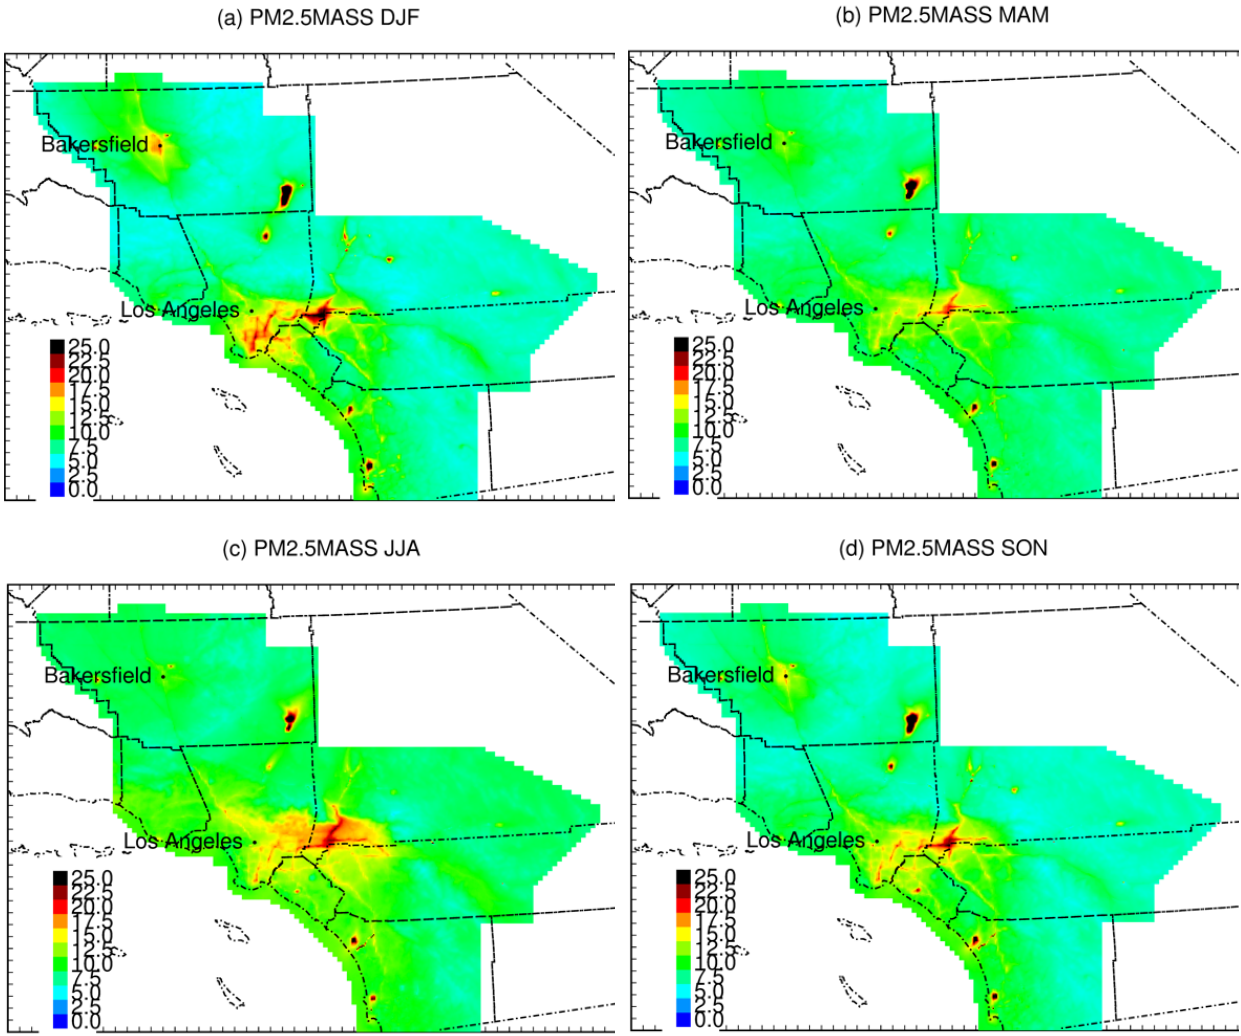

Figure 8: Predicted PM<sub>2.5</sub> mass exposure fields during four seasons in the year 2016. All units  $\mu\text{g m}^{-3}$ .

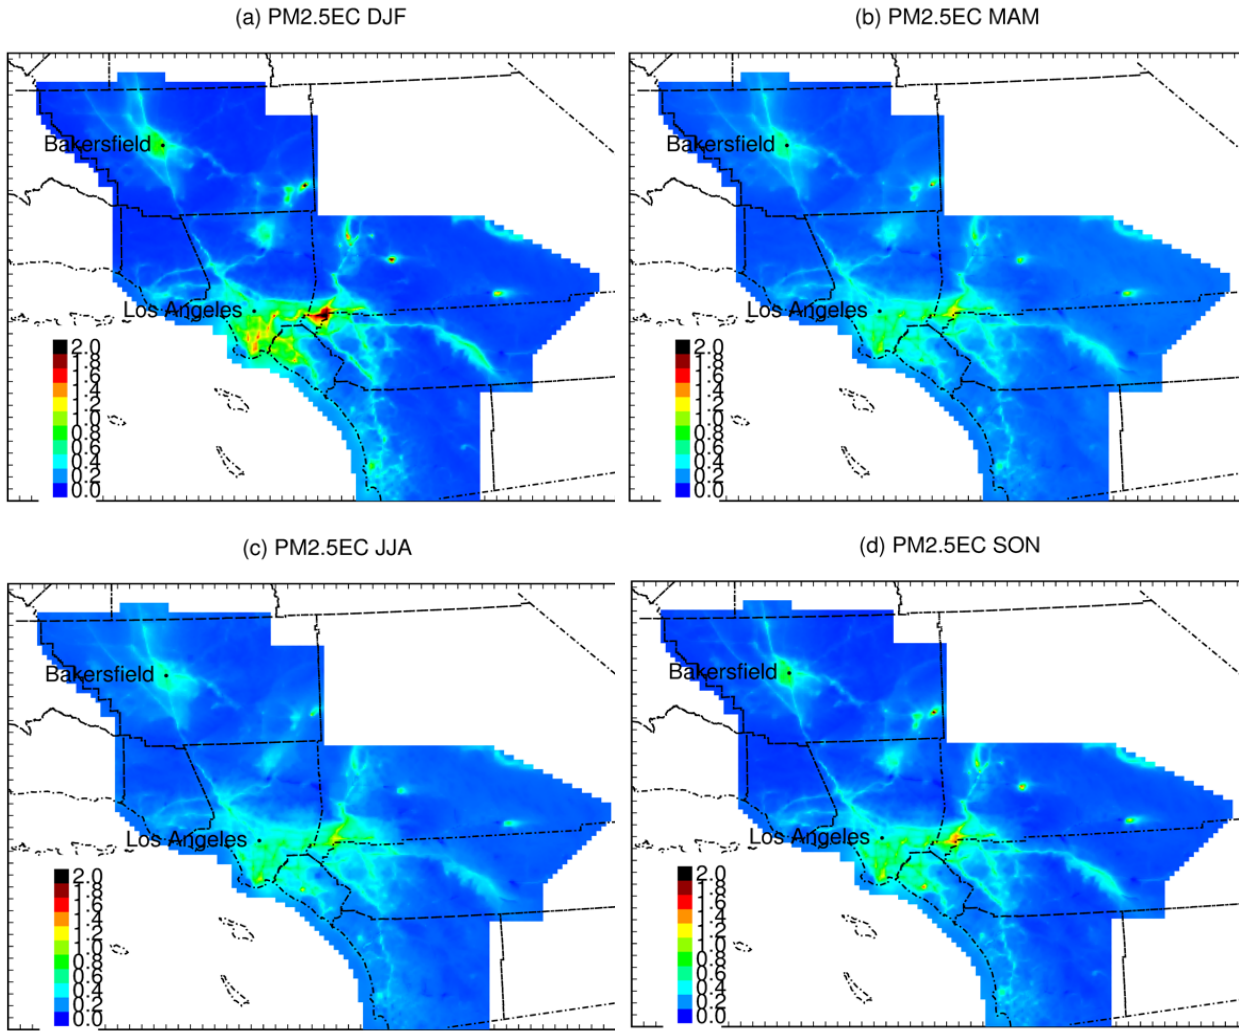

**Figure 9: Predicted PM<sub>2.5</sub> elemental carbon (EC) exposure fields during four seasons in the year 2016. All units  $\mu\text{g m}^{-3}$ .**

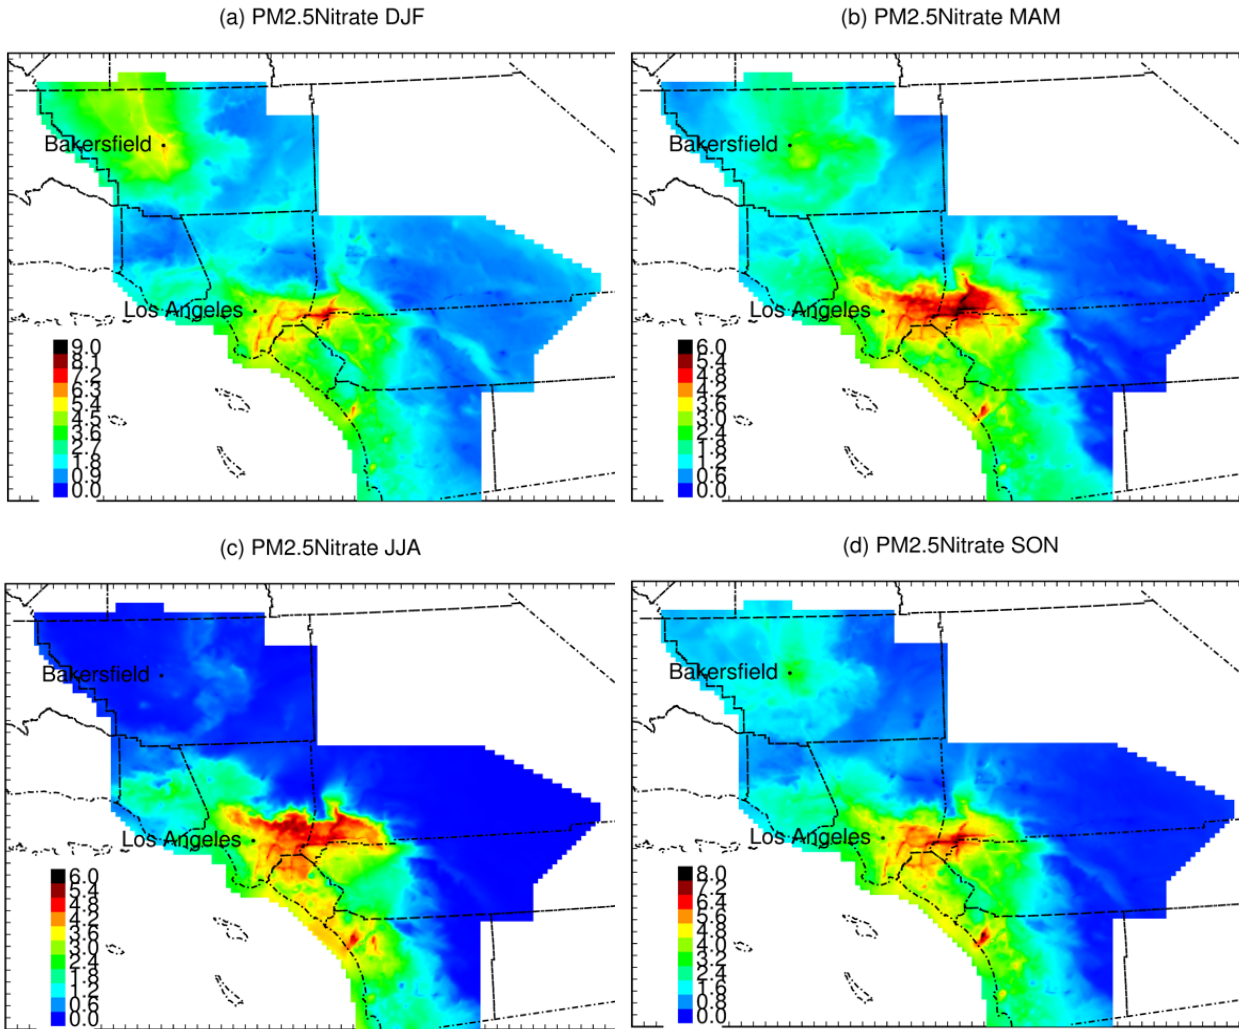

Figure 10: Predicted PM<sub>2.5</sub> nitrate exposure fields during four seasons in the year 2016. Note the different maximum values in different seasons. All units  $\mu\text{g m}^{-3}$ .



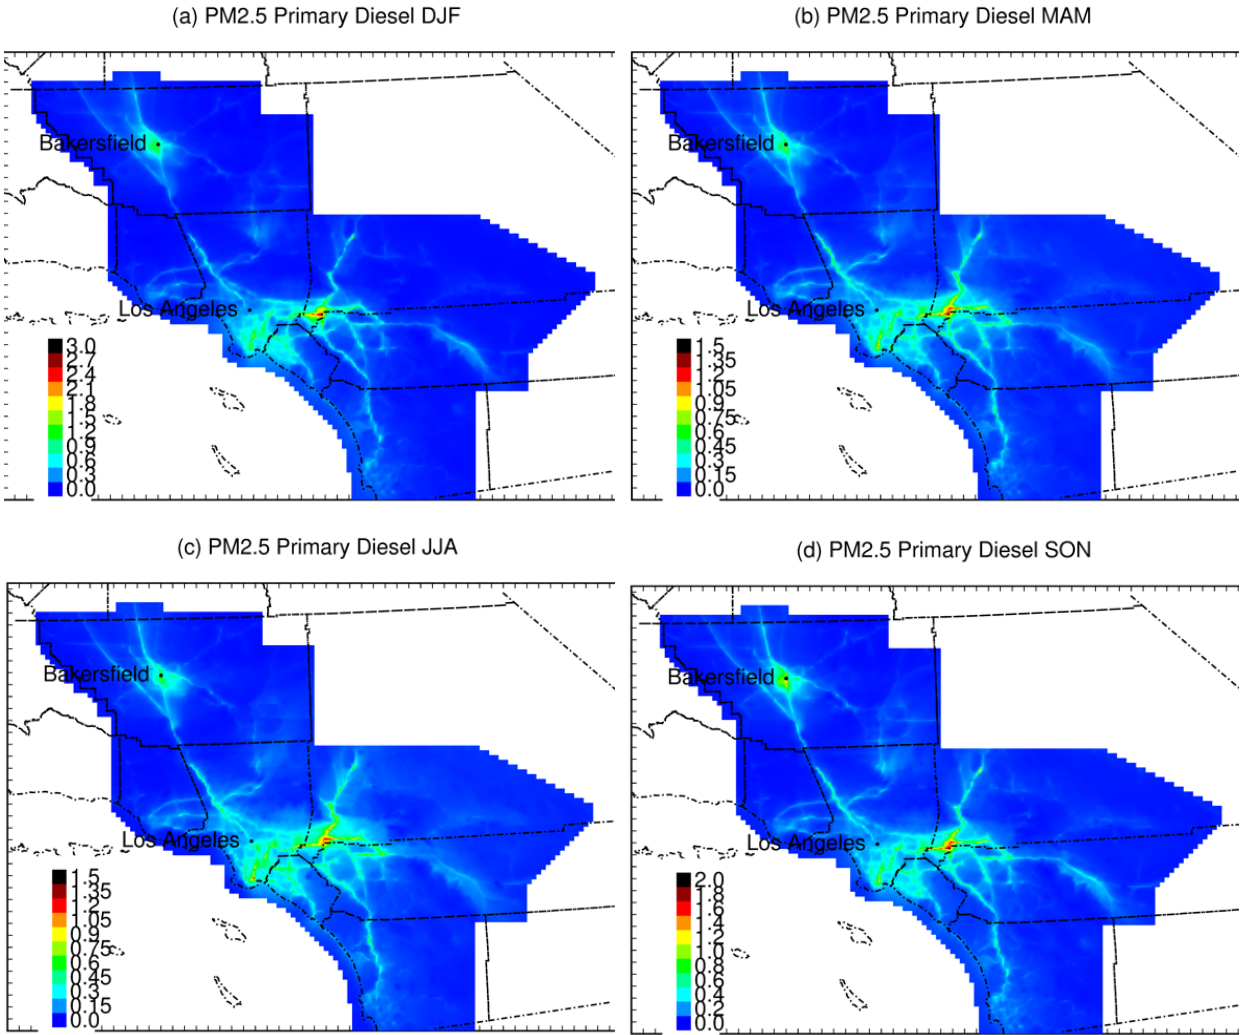

Figure 11: Predicted diesel primary PM<sub>2.5</sub> mass exposure fields during four seasons in the year 2016. Note the different maximum values in different seasons. All units  $\mu\text{g m}^{-3}$ .

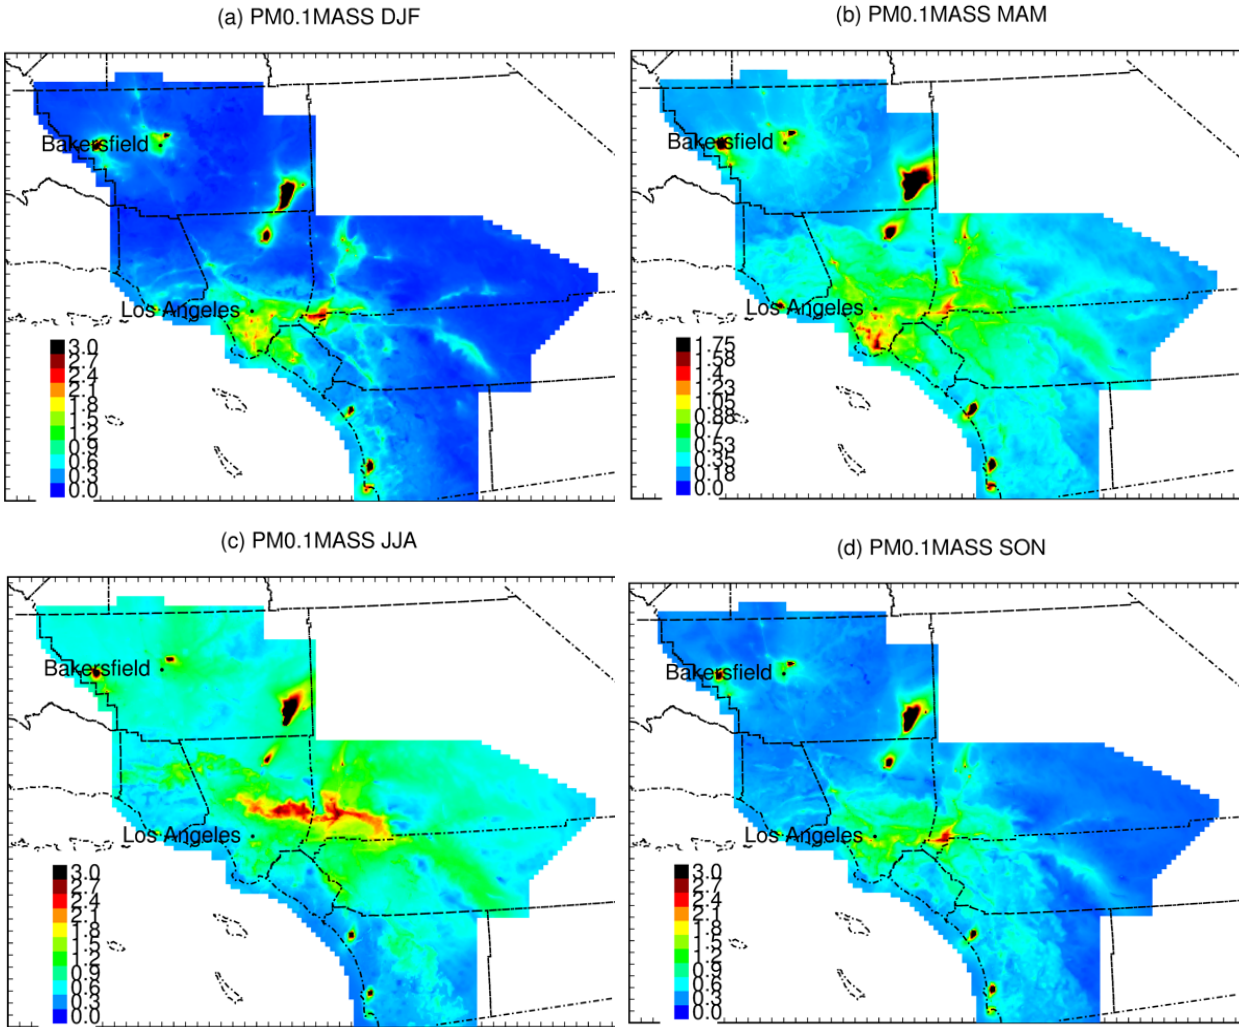

Figure 12: Predicted PM<sub>0.1</sub> mass exposure fields during four seasons in the year 2016. Note the different maximum values in different seasons. All units  $\mu\text{g m}^{-3}$ .

V. Confounder Analysis

Table 3 below shows the confounders selected for each pollutant based on the 10% criterion.

**Table 3: Confounders identified for each exposure based on the 10% change in the pollution coefficient selection rule where FALSE indicates not selected and TRUE indicates selected**

|                                                                   | NO <sub>2</sub> | O <sub>3</sub><br>(maximum) | NO <sub>2</sub><br>(CTM<br>and O <sub>3</sub> ) | PM <sub>2.5</sub><br>(mass) | PM <sub>2.5</sub><br>(mass<br>and O <sub>3</sub> ) | PM <sub>2.5</sub><br>(nitrate<br>s) | PM <sub>2.5</sub><br>(organic<br>carbon) | PM <sub>0.1</sub><br>(mass) | PM <sub>2.5</sub><br>(elemental<br>carbon) | On-<br>road<br>diesel<br>PM <sub>2.5</sub> | On-<br>road<br>gasoline<br>PM <sub>2.5</sub> | Biomass<br>combusti<br>on PM <sub>2.5</sub> | Relative<br>humidit<br>y (%) | Temp<br>eratu<br>re (C) |
|-------------------------------------------------------------------|-----------------|-----------------------------|-------------------------------------------------|-----------------------------|----------------------------------------------------|-------------------------------------|------------------------------------------|-----------------------------|--------------------------------------------|--------------------------------------------|----------------------------------------------|---------------------------------------------|------------------------------|-------------------------|
| Smoking status                                                    | FALSE           | FALSE                       | FALSE                                           | FALSE                       | FALSE                                              | FALSE                               | FALSE                                    | FALSE                       | FALSE                                      | FALSE                                      | FALSE                                        | FALSE                                       | FALSE                        | FALSE                   |
| BMI (linear and squared terms)                                    | TRUE            | FALSE                       | TRUE                                            | FALSE                       | FALSE                                              | FALSE                               | TRUE                                     | TRUE                        | TRUE                                       | TRUE                                       | TRUE                                         | TRUE                                        | FALSE                        | FALSE                   |
| Medicaid                                                          | FALSE           | FALSE                       | FALSE                                           | FALSE                       | FALSE                                              | FALSE                               | FALSE                                    | FALSE                       | FALSE                                      | FALSE                                      | FALSE                                        | FALSE                                       | FALSE                        | FALSE                   |
| Exercise Vital Sign                                               | TRUE            | FALSE                       | TRUE                                            | FALSE                       | FALSE                                              | FALSE                               | TRUE                                     | FALSE                       | TRUE                                       | FALSE                                      | TRUE                                         | FALSE                                       | FALSE                        | FALSE                   |
| Percent housing units with >1 occupants per room (Census)         | FALSE           | FALSE                       | FALSE                                           | FALSE                       | FALSE                                              | FALSE                               | TRUE                                     | FALSE                       | FALSE                                      | FALSE                                      | TRUE                                         | TRUE                                        | FALSE                        | FALSE                   |
| Neighborhood Deprivation Index                                    | TRUE            | FALSE                       | TRUE                                            | FALSE                       | FALSE                                              | FALSE                               | TRUE                                     | TRUE                        | TRUE                                       | FALSE                                      | TRUE                                         | TRUE                                        | FALSE                        | FALSE                   |
| Percent workers age 16+ commute by public transportation (Census) | FALSE           | FALSE                       | FALSE                                           | FALSE                       | FALSE                                              | FALSE                               | FALSE                                    | FALSE                       | FALSE                                      | FALSE                                      | FALSE                                        | FALSE                                       | FALSE                        | FALSE                   |
| Relative humidity (%)                                             | TRUE            | TRUE                        | TRUE                                            | FALSE                       | TRUE                                               | FALSE                               | TRUE                                     | FALSE                       | TRUE                                       | TRUE                                       | TRUE                                         | TRUE                                        | FALSE                        | TRUE                    |
| Temperature (C)                                                   | TRUE            | FALSE                       | TRUE                                            | TRUE                        | TRUE                                               | TRUE                                | TRUE                                     | TRUE                        | TRUE                                       | TRUE                                       | TRUE                                         | FALSE                                       | TRUE                         | FALSE                   |

VI. Unadjusted hazard ratios

**Table 4: Unadjusted hazard ratios**

| Characteristic                       | N      | Completely unadjusted |                     |                  | Stratified by age, sex, race/ethnicity |                     |                  |
|--------------------------------------|--------|-----------------------|---------------------|------------------|----------------------------------------|---------------------|------------------|
|                                      |        | HR <sup>1</sup>       | 95% CI <sup>1</sup> | p-value          | HR <sup>1</sup>                        | 95% CI <sup>1</sup> | p-value          |
| NO <sub>2</sub>                      | 21,415 | 1.013                 | 0.97, 1.061         | 0.59             | 1.04                                   | 0.99, 1.09          | 0.2              |
| O <sub>3</sub> (maximum)             | 21,415 | 1.106                 | 1.058, 1.156        | <b>&lt;0.001</b> | 1.15                                   | 1.10, 1.21          | <b>&lt;0.001</b> |
| PM <sub>2.5</sub> (mass)             | 21,415 | 1.050                 | 1.008, 1.094        | <b>0.019</b>     | 1.08                                   | 1.03, 1.13          | <b>&lt;0.001</b> |
| PM <sub>2.5</sub> (nitrates)         | 21,415 | 1.059                 | 1.018, 1.102        | <b>0.005</b>     | 1.08                                   | 1.03, 1.13          | <b>&lt;0.001</b> |
| PM <sub>2.5</sub> (organic carbon)   | 21,415 | 0.99                  | 0.947, 1.031        | 0.58             | 1.00                                   | 0.95, 1.05          | >0.9             |
| PM <sub>0.1</sub> (mass)             | 21,415 | 1.034                 | 1.002, 1.068        | <b>0.038</b>     | 1.05                                   | 1.02, 1.09          | <b>0.005</b>     |
| PM <sub>2.5</sub> (elemental carbon) | 21,415 | 1.008                 | 0.97, 1.048         | 0.71             | 1.04                                   | 0.99, 1.09          | 0.094            |
| On-road diesel PM <sub>2.5</sub>     | 21,415 | 1.022                 | 0.99, 1.056         | 0.21             | 1.05                                   | 1.01, 1.09          | <b>0.008</b>     |
| On-road gasoline PM <sub>2.5</sub>   | 21,415 | 0.99                  | 0.950, 1.028        | 0.56             | 1.01                                   | 0.97, 1.06          | 0.5              |
| Biomass combustion PM <sub>2.5</sub> | 21,415 | 0.99                  | 0.96, 1.021         | 0.50             | 0.98                                   | 0.95, 1.02          | 0.3              |
| Relative humidity (%)                | 21,409 | 0.806                 | 0.771, 0.843        | <b>&lt;0.001</b> | 0.79                                   | 0.75, 0.83          | <b>&lt;0.001</b> |
| Temperature (C)                      | 21,409 | 0.877                 | 0.852, 0.903        | <b>&lt;0.001</b> | 0.89                                   | 0.86, 0.92          | <b>&lt;0.001</b> |

<sup>1</sup>HR = Hazard Ratio, CI = Confidence Interval; bold shows p values < 0.05

**Table 5: Main Results for Fully adjusted Models by Exposure. Hazard ratios reported for the interquartile range exposure increment.**

| Pollutant or Source Tracer                   | HR <sup>1</sup> | 95% CI            | p-value          |
|----------------------------------------------|-----------------|-------------------|------------------|
| PM <sub>2.5</sub> (mass)                     | <b>1.12</b>     | <b>1.06, 1.17</b> | <b>&lt;0.001</b> |
| PM <sub>2.5</sub> (mass) and Ozone           | <b>1.10</b>     | <b>1.05, 1.15</b> | <b>&lt;0.001</b> |
|                                              | 1.02            | 0.96, 1.09        | 0.5              |
| PM <sub>2.5</sub> (mass) and NO <sub>2</sub> | <b>1.07</b>     | <b>1.00, 1.15</b> | <b>0.035</b>     |
|                                              | 1.03            | 0.95, 1.12        | 0.5              |
| PM <sub>2.5</sub> (nitrates)                 | <b>1.12</b>     | <b>1.07, 1.17</b> | <b>&lt;0.001</b> |
| PM <sub>2.5</sub> (organic carbon)           | 1.04            | 0.99, 1.10        | 0.13             |

| Pollutant or Source Tracer           | HR <sup>1</sup> | 95% CI            | p-value          |
|--------------------------------------|-----------------|-------------------|------------------|
| PM <sub>2.5</sub> (elemental carbon) | <b>1.07</b>     | <b>1.03, 1.13</b> | <b>0.002</b>     |
| On-road diesel PM <sub>2.5</sub>     | <b>1.06</b>     | <b>1.03, 1.10</b> | <b>&lt;0.001</b> |
| On-road gasoline PM <sub>2.5</sub>   | <b>1.07</b>     | <b>1.02, 1.13</b> | <b>0.004</b>     |
| Biomass combustion PM <sub>2.5</sub> | 0.99            | 0.96, 1.03        | 0.7              |
| PM <sub>0.1</sub> (mass)             | <b>1.06</b>     | <b>1.02, 1.10</b> | <b>0.007</b>     |
| NO <sub>2</sub>                      | <b>1.10</b>     | <b>1.04, 1.16</b> | <b>0.001</b>     |
| Ozone (maximum)                      | 1.02            | 0.96, 1.08        | 0.6              |
| NO <sub>2</sub> and Ozone            | <b>1.11</b>     | <b>1.05, 1.18</b> | <b>&lt;0.001</b> |
|                                      | 0.97            | 0.89, 1.05        | 0.4              |
| Relative humidity (%)                | <b>0.82</b>     | <b>0.78, 0.86</b> | <b>&lt;0.001</b> |
| Temperature (C)                      | <b>0.92</b>     | <b>0.89, 0.95</b> | <b>&lt;0.001</b> |

1 Based on interquartile exposure contrast for

each pollutant or source tracer. **Bolded** entries show significant p values less than 0.05.

## **VII. Stratification Analyses**

We ran the stratified models and tested for significant interactions with the pollutant models as shown in Table 5-7. The majority of the subgroup analyses were highly insignificant based on the Q statistic shown at the bottom of each table, meaning we did not find significant interactions between the air pollutants and the subgroups.

## Stratification by sex

Table 6: Stratification by sex

| Characteristic                   | F               |                     |         | M               |                     |         |
|----------------------------------|-----------------|---------------------|---------|-----------------|---------------------|---------|
|                                  | HR <sup>1</sup> | 95% CI <sup>1</sup> | p-value | HR <sup>1</sup> | 95% CI <sup>1</sup> | p-value |
| NO <sub>2</sub> /IQR             | 1.09            | 1.00, 1.19          | 0.056   | 1.10            | 1.03, 1.19          | 0.009   |
| BMI/IQR                          | 0.66            | 0.51, 0.87          | 0.003   | 0.76            | 0.59, 0.98          | 0.035   |
| BMI*BMI/IQR                      | 1.54            | 1.23, 1.94          | <0.001  | 1.39            | 1.11, 1.75          | 0.005   |
| Exercise Vital Sign (median)/IQR | 0.95            | 0.88, 1.01          | 0.11    | 0.97            | 0.94, 1.01          | 0.15    |
| NDI_ACS2013                      | 1.06            | 1.00, 1.12          | 0.034   | 1.02            | 0.98, 1.07          | 0.4     |
| Relative humidity (%)            | 0.99            | 0.98, 0.99          | <0.001  | 0.99            | 0.99, 0.99          | <0.001  |
| Temperature (C)                  | 0.99            | 0.98, 1.00          | 0.012   | 0.98            | 0.97, 0.99          | <0.001  |

<sup>1</sup>HR = Hazard Ratio, CI = Confidence Interval

## [1] "Q for NO2\_stdiqr is: 0.04, df is: 2, and p value is: 0.98"

| Characteristic               | F               |                     |         | M               |                     |         |
|------------------------------|-----------------|---------------------|---------|-----------------|---------------------|---------|
|                              | HR <sup>1</sup> | 95% CI <sup>1</sup> | p-value | HR <sup>1</sup> | 95% CI <sup>1</sup> | p-value |
| O <sub>3</sub> (maximum)/IQR | 1.00            | 0.91, 1.11          | >0.9    | 1.02            | 0.95, 1.10          | 0.5     |
| Relative humidity (%)        | 0.99            | 0.98, 0.99          | <0.001  | 0.99            | 0.99, 0.99          | <0.001  |

<sup>1</sup>HR = Hazard Ratio, CI = Confidence Interval

## [1] "Q for O3max\_stdiqr is: 0.08, df is: 2, and p value is: 0.961"

| Characteristic                   | F               |                     |         | M               |                     |         |
|----------------------------------|-----------------|---------------------|---------|-----------------|---------------------|---------|
|                                  | HR <sup>1</sup> | 95% CI <sup>1</sup> | p-value | HR <sup>1</sup> | 95% CI <sup>1</sup> | p-value |
| NO <sub>2</sub> /IQR             | 1.10            | 1.00, 1.20          | 0.044   | 1.11            | 1.03, 1.20          | 0.005   |
| O <sub>3</sub> (maximum)/IQR     | 1.06            | 0.96, 1.18          | 0.2     | 1.10            | 1.01, 1.19          | 0.023   |
| BMI/IQR                          | 0.66            | 0.51, 0.87          | 0.003   | 0.76            | 0.59, 0.98          | 0.037   |
| BMI*BMI/IQR                      | 1.54            | 1.23, 1.94          | <0.001  | 1.39            | 1.10, 1.75          | 0.005   |
| Exercise Vital Sign (median)/IQR | 0.95            | 0.89, 1.01          | 0.12    | 0.97            | 0.94, 1.01          | 0.2     |
| NDI_ACS2013                      | 1.06            | 1.01, 1.12          | 0.027   | 1.02            | 0.98, 1.07          | 0.3     |
| Relative humidity (%)            | 0.99            | 0.98, 0.99          | <0.001  | 0.99            | 0.99, 1.00          | 0.004   |
| Temperature (C)                  | 0.98            | 0.97, 1.00          | 0.008   | 0.98            | 0.97, 0.99          | <0.001  |

<sup>1</sup>HR = Hazard Ratio, CI = Confidence Interval

## [1] "Q for NO2\_stdiqr is: 0.054, df is: 2, and p value is: 0.974"

| Characteristic               | F               |                     |         | M               |                     |         |
|------------------------------|-----------------|---------------------|---------|-----------------|---------------------|---------|
|                              | HR <sup>1</sup> | 95% CI <sup>1</sup> | p-value | HR <sup>1</sup> | 95% CI <sup>1</sup> | p-value |
| PM <sub>2.5</sub> (mass)/IQR | 1.14            | 1.06, 1.23          | <0.001  | 1.10            | 1.04, 1.17          | 0.001   |
| Temperature (C)              | 0.98            | 0.97, 0.99          | <0.001  | 0.97            | 0.96, 0.98          | <0.001  |

<sup>1</sup>HR = Hazard Ratio, CI = Confidence Interval

## [1] "Q for pm2\_5mass\_stdiqr is: 0.476, df is: 2, and p value is: 0.788"

| Characteristic               | F               |                     |         | M               |                     |         |
|------------------------------|-----------------|---------------------|---------|-----------------|---------------------|---------|
|                              | HR <sup>1</sup> | 95% CI <sup>1</sup> | p-value | HR <sup>1</sup> | 95% CI <sup>1</sup> | p-value |
| PM <sub>2.5</sub> (mass)/IQR | 1.12            | 1.04, 1.21          | 0.004   | 1.08            | 1.02, 1.15          | 0.011   |
| O <sub>3</sub> (maximum)/IQR | 0.99            | 0.89, 1.11          | 0.9     | 1.04            | 0.96, 1.13          | 0.3     |
| Temperature (C)              | 0.98            | 0.97, 0.99          | 0.005   | 0.98            | 0.97, 0.99          | <0.001  |
| Relative humidity (%)        | 0.99            | 0.98, 0.99          | <0.001  | 0.99            | 0.99, 1.00          | 0.001   |

<sup>1</sup>HR = Hazard Ratio, CI = Confidence Interval

## [1] "Q for pm2\_5mass\_stdiqr is: 0.436, df is: 2, and p value is: 0.804"

| Characteristic                   | F               |                     |         | M               |                     |         |
|----------------------------------|-----------------|---------------------|---------|-----------------|---------------------|---------|
|                                  | HR <sup>1</sup> | 95% CI <sup>1</sup> | p-value | HR <sup>1</sup> | 95% CI <sup>1</sup> | p-value |
| PM <sub>2.5</sub> (nitrates)/IQR | 1.12            | 1.04, 1.22          | 0.004   | 1.12            | 1.05, 1.19          | <0.001  |
| Temperature (C)                  | 0.98            | 0.97, 0.99          | <0.001  | 0.97            | 0.96, 0.98          | <0.001  |

<sup>1</sup>HR = Hazard Ratio, CI = Confidence Interval

## [1] "Q for pm2\_5n\_v\_stdiqr is: 0.011, df is: 2, and p value is: 0.995"

| Characteristic                                   | F               |                     |         | M               |                     |         |
|--------------------------------------------------|-----------------|---------------------|---------|-----------------|---------------------|---------|
|                                                  | HR <sup>1</sup> | 95% CI <sup>1</sup> | p-value | HR <sup>1</sup> | 95% CI <sup>1</sup> | p-value |
| PM <sub>2.5</sub> (organic carbon)/IQR           | 1.07            | 0.98, 1.16          | 0.11    | 1.02            | 0.96, 1.09          | 0.5     |
| BMI/IQR                                          | 0.66            | 0.51, 0.87          | 0.003   | 0.76            | 0.58, 0.98          | 0.033   |
| BMI*BMI/IQR                                      | 1.54            | 1.23, 1.94          | <0.001  | 1.40            | 1.11, 1.76          | 0.004   |
| Exercise Vital Sign (median)/IQR                 | 0.94            | 0.88, 1.01          | 0.10    | 0.97            | 0.94, 1.01          | 0.2     |
| Percent housing units with >1 occupants per room | 0.96            | 0.53, 1.72          | 0.9     | 1.12            | 0.72, 1.73          | 0.6     |
| NDI_ACS2013                                      | 1.06            | 1.00, 1.14          | 0.062   | 1.02            | 0.97, 1.08          | 0.4     |
| Relative humidity (%)                            | 0.99            | 0.98, 0.99          | <0.001  | 0.99            | 0.99, 1.00          | <0.001  |
| Temperature (C)                                  | 0.99            | 0.98, 1.00          | 0.011   | 0.98            | 0.97, 0.99          | <0.001  |

<sup>1</sup>HR = Hazard Ratio, CI = Confidence Interval

## [1] "Q for pm2\_5oc\_stdiqr is: 0.602, df is: 2, and p value is: 0.74"



| Characteristic               | F               |                     |         | M               |                     |         |
|------------------------------|-----------------|---------------------|---------|-----------------|---------------------|---------|
|                              | HR <sup>1</sup> | 95% CI <sup>1</sup> | p-value | HR <sup>1</sup> | 95% CI <sup>1</sup> | p-value |
| PM <sub>0.1</sub> (mass)/IQR | 1.11            | 1.04, 1.18          | 0.001   | 1.03            | 0.98, 1.09          | 0.2     |
| BMI/IQR                      | 0.69            | 0.53, 0.91          | 0.009   | 0.79            | 0.61, 1.02          | 0.070   |
| BMI*BMI/IQR                  | 1.50            | 1.19, 1.89          | <0.001  | 1.37            | 1.09, 1.73          | 0.007   |
| NDI_ACS2013                  | 1.04            | 0.99, 1.10          | 0.12    | 1.03            | 0.98, 1.07          | 0.2     |
| Temperature (C)              | 0.98            | 0.97, 0.99          | <0.001  | 0.97            | 0.97, 0.98          | <0.001  |

<sup>1</sup>HR = Hazard Ratio, CI = Confidence Interval

## [1] "Q for pm0\_1mass\_stdigr is: 2.948, df is: 2, and p value is: 0.229"

| Characteristic                           | F               |                     |         | M               |                     |         |
|------------------------------------------|-----------------|---------------------|---------|-----------------|---------------------|---------|
|                                          | HR <sup>1</sup> | 95% CI <sup>1</sup> | p-value | HR <sup>1</sup> | 95% CI <sup>1</sup> | p-value |
| PM <sub>2.5</sub> (elemental carbon)/IQR | 1.07            | 0.99, 1.15          | 0.070   | 1.08            | 1.02, 1.15          | 0.014   |
| BMI/IQR                                  | 0.66            | 0.50, 0.87          | 0.003   | 0.76            | 0.59, 0.98          | 0.035   |
| BMI*BMI/IQR                              | 1.55            | 1.23, 1.94          | <0.001  | 1.39            | 1.11, 1.75          | 0.005   |
| Exercise Vital Sign (median)/IQR         | 0.95            | 0.88, 1.01          | 0.11    | 0.97            | 0.94, 1.01          | 0.2     |
| NDI_ACS2013                              | 1.07            | 1.01, 1.12          | 0.018   | 1.03            | 0.98, 1.07          | 0.2     |
| Relative humidity (%)                    | 0.99            | 0.98, 0.99          | <0.001  | 0.99            | 0.99, 1.00          | <0.001  |
| Temperature (C)                          | 0.99            | 0.98, 1.00          | 0.010   | 0.98            | 0.97, 0.99          | <0.001  |

<sup>1</sup>HR = Hazard Ratio, CI = Confidence Interval

## [1] "Q for pm2\_5ec\_stdigr is: 0.034, df is: 2, and p value is: 0.983"

| Characteristic                        | F               |                     |         | M               |                     |         |
|---------------------------------------|-----------------|---------------------|---------|-----------------|---------------------|---------|
|                                       | HR <sup>1</sup> | 95% CI <sup>1</sup> | p-value | HR <sup>1</sup> | 95% CI <sup>1</sup> | p-value |
| On-road diesel PM <sub>2.5</sub> /IQR | 1.06            | 1.01, 1.13          | 0.032   | 1.06            | 1.01, 1.11          | 0.012   |
| BMI/IQR                               | 0.67            | 0.51, 0.88          | 0.004   | 0.78            | 0.61, 1.02          | 0.066   |
| BMI*BMI/IQR                           | 1.54            | 1.22, 1.93          | <0.001  | 1.37            | 1.09, 1.72          | 0.008   |
| Relative humidity (%)                 | 0.99            | 0.99, 0.99          | <0.001  | 0.99            | 0.99, 1.00          | <0.001  |
| Temperature (C)                       | 0.99            | 0.98, 1.00          | 0.009   | 0.98            | 0.97, 0.99          | <0.001  |

<sup>1</sup>HR = Hazard Ratio, CI = Confidence Interval

## [1] "Q for pm2\_5tracer3\_stdigr is: 0.002, df is: 2, and p value is: 0.999"

| Characteristic                                   | F               |                     |         | M               |                     |         |
|--------------------------------------------------|-----------------|---------------------|---------|-----------------|---------------------|---------|
|                                                  | HR <sup>1</sup> | 95% CI <sup>1</sup> | p-value | HR <sup>1</sup> | 95% CI <sup>1</sup> | p-value |
| On-road gasoline PM <sub>2.5</sub> /IQR          | 1.06            | 0.98, 1.14          | 0.14    | 1.08            | 1.02, 1.15          | 0.014   |
| BMI/IQR                                          | 0.66            | 0.50, 0.87          | 0.003   | 0.76            | 0.58, 0.98          | 0.034   |
| BMI*BMI/IQR                                      | 1.55            | 1.23, 1.94          | <0.001  | 1.40            | 1.11, 1.76          | 0.004   |
| Exercise Vital Sign (median)/IQR                 | 0.94            | 0.88, 1.01          | 0.10    | 0.97            | 0.94, 1.01          | 0.14    |
| Percent housing units with >1 occupants per room | 0.95            | 0.53, 1.70          | 0.9     | 1.05            | 0.68, 1.63          | 0.8     |
| NDI_ACS2013                                      | 1.07            | 1.00, 1.14          | 0.042   | 1.02            | 0.97, 1.08          | 0.4     |
| Relative humidity (%)                            | 0.99            | 0.98, 0.99          | <0.001  | 0.99            | 0.99, 0.99          | <0.001  |
| Temperature (C)                                  | 0.99            | 0.98, 1.00          | 0.012   | 0.98            | 0.97, 0.99          | <0.001  |

<sup>1</sup>HR = Hazard Ratio, CI = Confidence Interval

## [1] "Q for pm2\_5tracer1\_stdigr is: 0.149, df is: 2, and p value is: 0.928"

| Characteristic                                   | F               |                     |         | M               |                     |         |
|--------------------------------------------------|-----------------|---------------------|---------|-----------------|---------------------|---------|
|                                                  | HR <sup>1</sup> | 95% CI <sup>1</sup> | p-value | HR <sup>1</sup> | 95% CI <sup>1</sup> | p-value |
| Biomass combustion PM <sub>2.5</sub> /IQR        | 1.02            | 0.97, 1.08          | 0.5     | 0.98            | 0.94, 1.02          | 0.3     |
| BMI/IQR                                          | 0.67            | 0.51, 0.88          | 0.004   | 0.78            | 0.60, 1.00          | 0.052   |
| BMI*BMI/IQR                                      | 1.54            | 1.23, 1.93          | <0.001  | 1.38            | 1.11, 1.73          | 0.004   |
| Percent housing units with >1 occupants per room | 0.99            | 0.55, 1.78          | >0.9    | 1.19            | 0.77, 1.83          | 0.4     |
| NDI_ACS2013                                      | 1.07            | 1.00, 1.14          | 0.051   | 1.03            | 0.98, 1.09          | 0.3     |
| Relative humidity (%)                            | 0.99            | 0.98, 0.99          | <0.001  | 0.99            | 0.99, 0.99          | <0.001  |

<sup>1</sup>HR = Hazard Ratio, CI = Confidence Interval

## [1] "Q for pm2\_5tracer6\_stdigr is: 1.169, df is: 2, and p value is: 0.557"

| Characteristic            | F               |                     |         | M               |                     |         |
|---------------------------|-----------------|---------------------|---------|-----------------|---------------------|---------|
|                           | HR <sup>1</sup> | 95% CI <sup>1</sup> | p-value | HR <sup>1</sup> | 95% CI <sup>1</sup> | p-value |
| Relative humidity (%)/IQR | 0.78            | 0.72, 0.85          | <0.001  | 0.85            | 0.80, 0.90          | <0.001  |
| Temperature (C)           | 0.99            | 0.98, 1.00          | 0.007   | 0.98            | 0.97, 0.99          | <0.001  |

<sup>1</sup>HR = Hazard Ratio, CI = Confidence Interval

## [1] "Q for rmax\_k\_stdigr is: 2.062, df is: 2, and p value is: 0.357"

| Characteristic        | F               |                     |         | M               |                     |         |
|-----------------------|-----------------|---------------------|---------|-----------------|---------------------|---------|
|                       | HR <sup>1</sup> | 95% CI <sup>1</sup> | p-value | HR <sup>1</sup> | 95% CI <sup>1</sup> | p-value |
| Temperature (C)/IQR   | 0.93            | 0.88, 0.98          | 0.007   | 0.91            | 0.87, 0.95          | <0.001  |
| Relative humidity (%) | 0.99            | 0.99, 0.99          | <0.001  | 0.99            | 0.99, 1.00          | <0.001  |

|                | F               |                     |         | M               |                     |         |
|----------------|-----------------|---------------------|---------|-----------------|---------------------|---------|
| Characteristic | HR <sup>1</sup> | 95% CI <sup>1</sup> | p-value | HR <sup>1</sup> | 95% CI <sup>1</sup> | p-value |

<sup>1</sup>HR = Hazard Ratio, CI = Confidence Interval

## [1] "Q for tmmx\_c\_stdiqr is: 0.321, df is: 2, and p value is: 0.852"

## Stratification by number of disease categories

Table 7: Stratification by number of disease categories

| Characteristic                   | Number of COPD, CVD, HTN, DM: 0 |         |                 |                     |         | Number of COPD, CVD, HTN, DM: 1 |         |                 |                     |         | Number of COPD, CVD, HTN, DM: 2+ |         |                 |                     |         |
|----------------------------------|---------------------------------|---------|-----------------|---------------------|---------|---------------------------------|---------|-----------------|---------------------|---------|----------------------------------|---------|-----------------|---------------------|---------|
|                                  | N                               | Event N | HR <sup>1</sup> | 95% CI <sup>1</sup> | p-value | N                               | Event N | HR <sup>1</sup> | 95% CI <sup>1</sup> | p-value | N                                | Event N | HR <sup>1</sup> | 95% CI <sup>1</sup> | p-value |
| NO <sub>2</sub> /IQR             | 4,429                           | 405     | 1.00            | 0.80, 1.25          | >0.9    | 4,664                           | 761     | 1.24            | 1.04, 1.46          | 0.014   | 11,245                           | 3,475   | 1.10            | 1.03, 1.17          | 0.004   |
| BMI/IQR                          | 4,429                           | 405     | 0.56            | 0.29, 1.07          | 0.078   | 4,664                           | 761     | 0.80            | 0.44, 1.44          | 0.5     | 11,245                           | 3,475   | 0.68            | 0.55, 0.84          | <0.001  |
| BMI*BMI/IQR                      | 4,429                           | 405     | 1.91            | 1.17, 3.11          | 0.010   | 4,664                           | 761     | 1.38            | 0.84, 2.26          | 0.2     | 11,245                           | 3,475   | 1.49            | 1.24, 1.79          | <0.001  |
| Exercise Vital Sign (median)/IQR | 4,429                           | 405     | 0.92            | 0.83, 1.02          | 0.10    | 4,664                           | 761     | 0.93            | 0.85, 1.01          | 0.077   | 11,245                           | 3,475   | 0.98            | 0.94, 1.02          | 0.3     |
| NDI_ACS2013                      | 4,429                           | 405     | 1.20            | 1.05, 1.37          | 0.009   | 4,664                           | 761     | 1.03            | 0.94, 1.13          | 0.5     | 11,245                           | 3,475   | 1.02            | 0.98, 1.06          | 0.3     |
| Relative humidity (%)            | 4,429                           | 405     | 0.98            | 0.97, 0.99          | <0.001  | 4,664                           | 761     | 0.98            | 0.97, 0.99          | <0.001  | 11,245                           | 3,475   | 0.99            | 0.99, 1.00          | <0.001  |
| Temperature (C)                  | 4,429                           | 405     | 0.98            | 0.96, 1.01          | 0.2     | 4,664                           | 761     | 0.99            | 0.97, 1.01          | 0.2     | 11,245                           | 3,475   | 0.98            | 0.98, 0.99          | <0.001  |

<sup>1</sup>HR = Hazard Ratio, CI = Confidence Interval

## [1] "Q for NO2\_stdqr is: 2.033, df is: 3, and p value is: 0.566"

| Characteristic               | Number of COPD, CVD, HTN, DM: 0 |         |                 |                     |         | Number of COPD, CVD, HTN, DM: 1 |         |                 |                     |         | Number of COPD, CVD, HTN, DM: 2+ |         |                 |                     |         |
|------------------------------|---------------------------------|---------|-----------------|---------------------|---------|---------------------------------|---------|-----------------|---------------------|---------|----------------------------------|---------|-----------------|---------------------|---------|
|                              | N                               | Event N | HR <sup>1</sup> | 95% CI <sup>1</sup> | p-value | N                               | Event N | HR <sup>1</sup> | 95% CI <sup>1</sup> | p-value | N                                | Event N | HR <sup>1</sup> | 95% CI <sup>1</sup> | p-value |
| O <sub>3</sub> (maximum)/IQR | 4,841                           | 445     | 1.14            | 0.91, 1.44          | 0.3     | 4,786                           | 786     | 1.08            | 0.91, 1.27          | 0.4     | 11,372                           | 3,523   | 1.03            | 0.96, 1.10          | 0.4     |
| Relative humidity (%)        | 4,841                           | 445     | 0.98            | 0.97, 0.99          | <0.001  | 4,786                           | 786     | 0.98            | 0.98, 0.99          | <0.001  | 11,372                           | 3,523   | 0.99            | 0.99, 1.00          | <0.001  |

<sup>1</sup>HR = Hazard Ratio, CI = Confidence Interval

## [1] "Q for O3max\_stdqr is: 0.72, df is: 3, and p value is: 0.869"

| Characteristic       | Number of COPD, CVD, HTN, DM: 0 |         |                 |                     |         | Number of COPD, CVD, HTN, DM: 1 |         |                 |                     |         | Number of COPD, CVD, HTN, DM: 2+ |         |                 |                     |         |
|----------------------|---------------------------------|---------|-----------------|---------------------|---------|---------------------------------|---------|-----------------|---------------------|---------|----------------------------------|---------|-----------------|---------------------|---------|
|                      | N                               | Event N | HR <sup>1</sup> | 95% CI <sup>1</sup> | p-value | N                               | Event N | HR <sup>1</sup> | 95% CI <sup>1</sup> | p-value | N                                | Event N | HR <sup>1</sup> | 95% CI <sup>1</sup> | p-value |
| NO <sub>2</sub> /IQR | 4,429                           | 405     | 1.05            | 0.82, 1.33          | 0.7     | 4,664                           | 761     | 1.27            | 1.07, 1.51          | 0.007   | 11,245                           | 3,475   | 1.11            | 1.04, 1.18          | 0.002   |

| Characteristic                   | Number of COPD, CVD, HTN, DM: 0 |         |                 |                     |         | Number of COPD, CVD, HTN, DM: 1 |         |                 |                     |         | Number of COPD, CVD, HTN, DM: 2+ |         |                 |                     |         |
|----------------------------------|---------------------------------|---------|-----------------|---------------------|---------|---------------------------------|---------|-----------------|---------------------|---------|----------------------------------|---------|-----------------|---------------------|---------|
|                                  | N                               | Event N | HR <sup>1</sup> | 95% CI <sup>1</sup> | p-value | N                               | Event N | HR <sup>1</sup> | 95% CI <sup>1</sup> | p-value | N                                | Event N | HR <sup>1</sup> | 95% CI <sup>1</sup> | p-value |
| O <sub>3</sub> (maximum)/IQR     | 4,429                           | 405     | 1.23            | 0.92, 1.65          | 0.2     | 4,664                           | 761     | 1.19            | 0.98, 1.44          | 0.072   | 11,245                           | 3,475   | 1.08            | 1.01, 1.16          | 0.030   |
| BMI/IQR                          | 4,429                           | 405     | 0.57            | 0.30, 1.08          | 0.083   | 4,664                           | 761     | 0.81            | 0.45, 1.46          | 0.5     | 11,245                           | 3,475   | 0.68            | 0.55, 0.84          | <0.001  |
| BMI*BMI/IQR                      | 4,429                           | 405     | 1.88            | 1.16, 3.07          | 0.011   | 4,664                           | 761     | 1.36            | 0.83, 2.22          | 0.2     | 11,245                           | 3,475   | 1.49            | 1.24, 1.79          | <0.001  |
| Exercise Vital Sign (median)/IQR | 4,429                           | 405     | 0.92            | 0.83, 1.02          | 0.10    | 4,664                           | 761     | 0.93            | 0.85, 1.02          | 0.11    | 11,245                           | 3,475   | 0.98            | 0.94, 1.02          | 0.3     |
| NDI_ACS2013                      | 4,429                           | 405     | 1.21            | 1.06, 1.39          | 0.006   | 4,664                           | 761     | 1.05            | 0.96, 1.15          | 0.3     | 11,245                           | 3,475   | 1.02            | 0.99, 1.07          | 0.2     |
| Relative humidity (%)            | 4,429                           | 405     | 0.98            | 0.97, 1.00          | 0.007   | 4,664                           | 761     | 0.98            | 0.98, 0.99          | <0.001  | 11,245                           | 3,475   | 0.99            | 0.99, 1.00          | 0.001   |
| Temperature (C)                  | 4,429                           | 405     | 0.98            | 0.95, 1.00          | 0.091   | 4,664                           | 761     | 0.98            | 0.96, 1.00          | 0.086   | 11,245                           | 3,475   | 0.98            | 0.97, 0.99          | <0.001  |

<sup>1</sup>HR = Hazard Ratio, CI = Confidence Interval

## [1] "Q for NO2\_stdqr is: 2.103, df is: 3, and p value is: 0.551"

| Characteristic               | Number of COPD, CVD, HTN, DM: 0 |         |                 |                     |         | Number of COPD, CVD, HTN, DM: 1 |         |                 |                     |         | Number of COPD, CVD, HTN, DM: 2+ |         |                 |                     |         |
|------------------------------|---------------------------------|---------|-----------------|---------------------|---------|---------------------------------|---------|-----------------|---------------------|---------|----------------------------------|---------|-----------------|---------------------|---------|
|                              | N                               | Event N | HR <sup>1</sup> | 95% CI <sup>1</sup> | p-value | N                               | Event N | HR <sup>1</sup> | 95% CI <sup>1</sup> | p-value | N                                | Event N | HR <sup>1</sup> | 95% CI <sup>1</sup> | p-value |
| PM <sub>2.5</sub> (mass)/IQR | 4,841                           | 445     | 1.30            | 1.09, 1.55          | 0.003   | 4,786                           | 786     | 1.27            | 1.12, 1.44          | <0.001  | 11,372                           | 3,523   | 1.10            | 1.04, 1.16          | <0.001  |
| Temperature (C)              | 4,841                           | 445     | 0.96            | 0.94, 0.98          | <0.001  | 4,786                           | 786     | 0.97            | 0.95, 0.99          | 0.002   | 11,372                           | 3,523   | 0.98            | 0.97, 0.99          | <0.001  |

<sup>1</sup>HR = Hazard Ratio, CI = Confidence Interval

## [1] "Q for pm2\_5mass\_stdqr is: 6.165, df is: 3, and p value is: 0.104"

| Characteristic               | Number of COPD, CVD, HTN, DM: 0 |         |                 |                     |         | Number of COPD, CVD, HTN, DM: 1 |         |                 |                     |         | Number of COPD, CVD, HTN, DM: 2+ |         |                 |                     |         |
|------------------------------|---------------------------------|---------|-----------------|---------------------|---------|---------------------------------|---------|-----------------|---------------------|---------|----------------------------------|---------|-----------------|---------------------|---------|
|                              | N                               | Event N | HR <sup>1</sup> | 95% CI <sup>1</sup> | p-value | N                               | Event N | HR <sup>1</sup> | 95% CI <sup>1</sup> | p-value | N                                | Event N | HR <sup>1</sup> | 95% CI <sup>1</sup> | p-value |
| PM <sub>2.5</sub> (mass)/IQR | 4,841                           | 445     | 1.21            | 1.01, 1.44          | 0.041   | 4,786                           | 786     | 1.24            | 1.08, 1.41          | 0.002   | 11,372                           | 3,523   | 1.08            | 1.02, 1.14          | 0.007   |
| O <sub>3</sub> (maximum)/IQR | 4,841                           | 445     | 1.14            | 0.88, 1.47          | 0.3     | 4,786                           | 786     | 1.02            | 0.85, 1.23          | 0.8     | 11,372                           | 3,523   | 1.03            | 0.96, 1.11          | 0.4     |
| Temperature (C)              | 4,841                           | 445     | 0.98            | 0.95, 1.00          | 0.089   | 4,786                           | 786     | 0.98            | 0.97, 1.00          | 0.11    | 11,372                           | 3,523   | 0.98            | 0.98, 0.99          | <0.001  |

| Characteristic        | Number of COPD, CVD, HTN, DM: 0 |         |                 |                     |         | Number of COPD, CVD, HTN, DM: 1 |         |                 |                     |         | Number of COPD, CVD, HTN, DM: 2+ |         |                 |                     |         |
|-----------------------|---------------------------------|---------|-----------------|---------------------|---------|---------------------------------|---------|-----------------|---------------------|---------|----------------------------------|---------|-----------------|---------------------|---------|
|                       | N                               | Event N | HR <sup>1</sup> | 95% CI <sup>1</sup> | p-value | N                               | Event N | HR <sup>1</sup> | 95% CI <sup>1</sup> | p-value | N                                | Event N | HR <sup>1</sup> | 95% CI <sup>1</sup> | p-value |
| Relative humidity (%) | 4,841                           | 445     | 0.99            | 0.97, 1.00          | 0.018   | 4,786                           | 786     | 0.98            | 0.98, 0.99          | <0.001  | 11,372                           | 3,523   | 0.99            | 0.99, 1.00          | <0.001  |

<sup>1</sup>HR = Hazard Ratio, CI = Confidence Interval

## [1] "Q for pm2\_5mass\_stdqir is: 3.651, df is: 3, and p value is: 0.302"

| Characteristic                   | Number of COPD, CVD, HTN, DM: 0 |         |                 |                     |         | Number of COPD, CVD, HTN, DM: 1 |         |                 |                     |         | Number of COPD, CVD, HTN, DM: 2+ |         |                 |                     |         |
|----------------------------------|---------------------------------|---------|-----------------|---------------------|---------|---------------------------------|---------|-----------------|---------------------|---------|----------------------------------|---------|-----------------|---------------------|---------|
|                                  | N                               | Event N | HR <sup>1</sup> | 95% CI <sup>1</sup> | p-value | N                               | Event N | HR <sup>1</sup> | 95% CI <sup>1</sup> | p-value | N                                | Event N | HR <sup>1</sup> | 95% CI <sup>1</sup> | p-value |
| PM <sub>2.5</sub> (nitrates)/IQR | 4,841                           | 445     | 1.47            | 1.22, 1.77          | <0.001  | 4,786                           | 786     | 1.16            | 1.01, 1.33          | 0.036   | 11,372                           | 3,523   | 1.11            | 1.05, 1.17          | <0.001  |
| Temperature (C)                  | 4,841                           | 445     | 0.96            | 0.94, 0.98          | <0.001  | 4,786                           | 786     | 0.97            | 0.95, 0.99          | 0.003   | 11,372                           | 3,523   | 0.98            | 0.97, 0.99          | <0.001  |

<sup>1</sup>HR = Hazard Ratio, CI = Confidence Interval

## [1] "Q for pm2\_5n\_v\_stdqir is: 7.251, df is: 3, and p value is: 0.064"

| Characteristic                                   | Number of COPD, CVD, HTN, DM: 0 |         |                 |                     |         | Number of COPD, CVD, HTN, DM: 1 |         |                 |                     |         | Number of COPD, CVD, HTN, DM: 2+ |         |                 |                     |         |
|--------------------------------------------------|---------------------------------|---------|-----------------|---------------------|---------|---------------------------------|---------|-----------------|---------------------|---------|----------------------------------|---------|-----------------|---------------------|---------|
|                                                  | N                               | Event N | HR <sup>1</sup> | 95% CI <sup>1</sup> | p-value | N                               | Event N | HR <sup>1</sup> | 95% CI <sup>1</sup> | p-value | N                                | Event N | HR <sup>1</sup> | 95% CI <sup>1</sup> | p-value |
| PM <sub>2.5</sub> (organic carbon)/IQR           | 4,322                           | 396     | 0.94            | 0.78, 1.14          | 0.5     | 4,533                           | 745     | 1.20            | 1.03, 1.40          | 0.021   | 10,942                           | 3,377   | 1.03            | 0.97, 1.09          | 0.3     |
| BMI/IQR                                          | 4,322                           | 396     | 0.56            | 0.29, 1.07          | 0.078   | 4,533                           | 745     | 0.79            | 0.44, 1.43          | 0.4     | 10,942                           | 3,377   | 0.68            | 0.55, 0.84          | <0.001  |
| BMI*BMI/IQR                                      | 4,322                           | 396     | 1.92            | 1.17, 3.13          | 0.009   | 4,533                           | 745     | 1.39            | 0.85, 2.27          | 0.2     | 10,942                           | 3,377   | 1.50            | 1.24, 1.80          | <0.001  |
| Exercise Vital Sign (median)/IQR                 | 4,322                           | 396     | 0.92            | 0.83, 1.02          | 0.11    | 4,533                           | 745     | 0.93            | 0.85, 1.01          | 0.090   | 10,942                           | 3,377   | 0.98            | 0.94, 1.02          | 0.3     |
| Percent housing units with >1 occupants per room | 4,322                           | 396     | 0.73            | 0.19, 2.89          | 0.7     | 4,533                           | 745     | 0.77            | 0.27, 2.18          | 0.6     | 10,942                           | 3,377   | 1.26            | 0.83, 1.91          | 0.3     |
| NDI_ACS2013                                      | 4,322                           | 396     | 1.23            | 1.04, 1.44          | 0.013   | 4,533                           | 745     | 1.05            | 0.94, 1.18          | 0.4     | 10,942                           | 3,377   | 1.01            | 0.97, 1.06          | 0.5     |

| Characteristic        | Number of COPD, CVD, HTN, DM: 0 |         |                 |                     |         | Number of COPD, CVD, HTN, DM: 1 |         |                 |                     |         | Number of COPD, CVD, HTN, DM: 2+ |         |                 |                     |         |
|-----------------------|---------------------------------|---------|-----------------|---------------------|---------|---------------------------------|---------|-----------------|---------------------|---------|----------------------------------|---------|-----------------|---------------------|---------|
|                       | N                               | Event N | HR <sup>1</sup> | 95% CI <sup>1</sup> | p-value | N                               | Event N | HR <sup>1</sup> | 95% CI <sup>1</sup> | p-value | N                                | Event N | HR <sup>1</sup> | 95% CI <sup>1</sup> | p-value |
| Relative humidity (%) | 4,322                           | 396     | 0.98            | 0.97, 0.99          | <0.001  | 4,533                           | 745     | 0.98            | 0.97, 0.99          | <0.001  | 10,942                           | 3,377   | 0.99            | 0.99, 1.00          | <0.001  |
| Temperature (C)       | 4,322                           | 396     | 0.99            | 0.96, 1.01          | 0.2     | 4,533                           | 745     | 0.99            | 0.97, 1.01          | 0.3     | 10,942                           | 3,377   | 0.98            | 0.98, 0.99          | <0.001  |

<sup>1</sup>HR = Hazard Ratio, CI = Confidence Interval

## [1] "Q for pm2\_5oc\_stdiqr is: 3.622, df is: 3, and p value is: 0.305"

| Characteristic               | Number of COPD, CVD, HTN, DM: 0 |         |                 |                     |         | Number of COPD, CVD, HTN, DM: 1 |         |                 |                     |         | Number of COPD, CVD, HTN, DM: 2+ |         |                 |                     |         |
|------------------------------|---------------------------------|---------|-----------------|---------------------|---------|---------------------------------|---------|-----------------|---------------------|---------|----------------------------------|---------|-----------------|---------------------|---------|
|                              | N                               | Event N | HR <sup>1</sup> | 95% CI <sup>1</sup> | p-value | N                               | Event N | HR <sup>1</sup> | 95% CI <sup>1</sup> | p-value | N                                | Event N | HR <sup>1</sup> | 95% CI <sup>1</sup> | p-value |
| PM <sub>0.1</sub> (mass)/IQR | 4,528                           | 412     | 1.20            | 1.02, 1.40          | 0.025   | 4,700                           | 766     | 1.15            | 1.05, 1.26          | 0.004   | 11,296                           | 3,492   | 1.04            | 0.99, 1.09          | 0.10    |
| BMI/IQR                      | 4,528                           | 412     | 0.50            | 0.27, 0.93          | 0.029   | 4,700                           | 766     | 0.91            | 0.50, 1.64          | 0.7     | 11,296                           | 3,492   | 0.71            | 0.57, 0.87          | 0.001   |
| BMI*BMI/IQR                  | 4,528                           | 412     | 2.11            | 1.32, 3.39          | 0.002   | 4,700                           | 766     | 1.24            | 0.76, 2.04          | 0.4     | 11,296                           | 3,492   | 1.46            | 1.21, 1.76          | <0.001  |
| NDI_ACS2013                  | 4,528                           | 412     | 1.14            | 1.00, 1.29          | 0.055   | 4,700                           | 766     | 1.03            | 0.94, 1.12          | 0.5     | 11,296                           | 3,492   | 1.02            | 0.99, 1.06          | 0.2     |
| Temperature (C)              | 4,528                           | 412     | 0.96            | 0.94, 0.98          | <0.001  | 4,700                           | 766     | 0.97            | 0.96, 0.99          | 0.003   | 11,296                           | 3,492   | 0.98            | 0.97, 0.99          | <0.001  |

<sup>1</sup>HR = Hazard Ratio, CI = Confidence Interval

## [1] "Q for pm0\_1mass\_stdiqr is: 4.96, df is: 3, and p value is: 0.175"

| Characteristic                           | Number of COPD, CVD, HTN, DM: 0 |         |                 |                     |         | Number of COPD, CVD, HTN, DM: 1 |         |                 |                     |         | Number of COPD, CVD, HTN, DM: 2+ |         |                 |                     |         |
|------------------------------------------|---------------------------------|---------|-----------------|---------------------|---------|---------------------------------|---------|-----------------|---------------------|---------|----------------------------------|---------|-----------------|---------------------|---------|
|                                          | N                               | Event N | HR <sup>1</sup> | 95% CI <sup>1</sup> | p-value | N                               | Event N | HR <sup>1</sup> | 95% CI <sup>1</sup> | p-value | N                                | Event N | HR <sup>1</sup> | 95% CI <sup>1</sup> | p-value |
| PM <sub>2.5</sub> (elemental carbon)/IQR | 4,429                           | 405     | 1.12            | 0.94, 1.32          | 0.2     | 4,664                           | 761     | 1.20            | 1.05, 1.37          | 0.007   | 11,245                           | 3,475   | 1.07            | 1.01, 1.13          | 0.013   |
| BMI/IQR                                  | 4,429                           | 405     | 0.56            | 0.30, 1.06          | 0.075   | 4,664                           | 761     | 0.79            | 0.44, 1.43          | 0.4     | 11,245                           | 3,475   | 0.68            | 0.55, 0.84          | <0.001  |
| BMI*BMI/IQR                              | 4,429                           | 405     | 1.89            | 1.17, 3.08          | 0.010   | 4,664                           | 761     | 1.39            | 0.85, 2.27          | 0.2     | 11,245                           | 3,475   | 1.49            | 1.24, 1.80          | <0.001  |
| Exercise Vital Sign (median)/IQR         | 4,429                           | 405     | 0.92            | 0.83, 1.01          | 0.092   | 4,664                           | 761     | 0.93            | 0.85, 1.01          | 0.089   | 11,245                           | 3,475   | 0.98            | 0.94, 1.02          | 0.3     |
| NDI_ACS2013                              | 4,429                           | 405     | 1.19            | 1.04, 1.37          | 0.010   | 4,664                           | 761     | 1.05            | 0.96, 1.14          | 0.3     | 11,245                           | 3,475   | 1.03            | 0.99, 1.07          | 0.2     |

| Characteristic        | Number of COPD, CVD, HTN, DM: 0 |         |                 |                     |         | Number of COPD, CVD, HTN, DM: 1 |         |                 |                     |         | Number of COPD, CVD, HTN, DM: 2+ |         |                 |                     |         |
|-----------------------|---------------------------------|---------|-----------------|---------------------|---------|---------------------------------|---------|-----------------|---------------------|---------|----------------------------------|---------|-----------------|---------------------|---------|
|                       | N                               | Event N | HR <sup>1</sup> | 95% CI <sup>1</sup> | p-value | N                               | Event N | HR <sup>1</sup> | 95% CI <sup>1</sup> | p-value | N                                | Event N | HR <sup>1</sup> | 95% CI <sup>1</sup> | p-value |
| Relative humidity (%) | 4,429                           | 405     | 0.98            | 0.97, 0.99          | <0.001  | 4,664                           | 761     | 0.98            | 0.97, 0.99          | <0.001  | 11,245                           | 3,475   | 0.99            | 0.99, 1.00          | <0.001  |
| Temperature (C)       | 4,429                           | 405     | 0.98            | 0.96, 1.01          | 0.2     | 4,664                           | 761     | 0.99            | 0.97, 1.01          | 0.2     | 11,245                           | 3,475   | 0.98            | 0.98, 0.99          | <0.001  |

<sup>1</sup>HR = Hazard Ratio, CI = Confidence Interval

## [1] "Q for pm2\_5ec\_stdqir is: 2.148, df is: 3, and p value is: 0.542"

| Characteristic                        | Number of COPD, CVD, HTN, DM: 0 |         |                 |                     |         | Number of COPD, CVD, HTN, DM: 1 |         |                 |                     |         | Number of COPD, CVD, HTN, DM: 2+ |         |                 |                     |         |
|---------------------------------------|---------------------------------|---------|-----------------|---------------------|---------|---------------------------------|---------|-----------------|---------------------|---------|----------------------------------|---------|-----------------|---------------------|---------|
|                                       | N                               | Event N | HR <sup>1</sup> | 95% CI <sup>1</sup> | p-value | N                               | Event N | HR <sup>1</sup> | 95% CI <sup>1</sup> | p-value | N                                | Event N | HR <sup>1</sup> | 95% CI <sup>1</sup> | p-value |
| On-road diesel PM <sub>2.5</sub> /IQR | 4,529                           | 412     | 1.07            | 0.93, 1.23          | 0.3     | 4,700                           | 766     | 1.18            | 1.06, 1.30          | 0.001   | 11,296                           | 3,492   | 1.06            | 1.02, 1.11          | 0.008   |
| BMI/IQR                               | 4,529                           | 412     | 0.56            | 0.30, 1.07          | 0.081   | 4,700                           | 766     | 0.79            | 0.44, 1.42          | 0.4     | 11,296                           | 3,492   | 0.70            | 0.56, 0.86          | <0.001  |
| BMI*BMI/IQR                           | 4,529                           | 412     | 1.93            | 1.18, 3.15          | 0.009   | 4,700                           | 766     | 1.40            | 0.86, 2.27          | 0.2     | 11,296                           | 3,492   | 1.47            | 1.22, 1.77          | <0.001  |
| Relative humidity (%)                 | 4,529                           | 412     | 0.98            | 0.97, 0.99          | <0.001  | 4,700                           | 766     | 0.98            | 0.98, 0.99          | <0.001  | 11,296                           | 3,492   | 0.99            | 0.99, 1.00          | <0.001  |
| Temperature (C)                       | 4,529                           | 412     | 0.98            | 0.96, 1.00          | 0.10    | 4,700                           | 766     | 0.99            | 0.97, 1.01          | 0.2     | 11,296                           | 3,492   | 0.98            | 0.98, 0.99          | <0.001  |

<sup>1</sup>HR = Hazard Ratio, CI = Confidence Interval

## [1] "Q for pm2\_5tracer3\_stdqir is: 3.017, df is: 3, and p value is: 0.389"

| Characteristic                                   | Number of COPD, CVD, HTN, DM: 0 |         |                 |                     |         | Number of COPD, CVD, HTN, DM: 1 |         |                 |                     |         | Number of COPD, CVD, HTN, DM: 2+ |         |                 |                     |         |
|--------------------------------------------------|---------------------------------|---------|-----------------|---------------------|---------|---------------------------------|---------|-----------------|---------------------|---------|----------------------------------|---------|-----------------|---------------------|---------|
|                                                  | N                               | Event N | HR <sup>1</sup> | 95% CI <sup>1</sup> | p-value | N                               | Event N | HR <sup>1</sup> | 95% CI <sup>1</sup> | p-value | N                                | Event N | HR <sup>1</sup> | 95% CI <sup>1</sup> | p-value |
| On-road gasoline PM <sub>2.5</sub> /IQR          | 4,322                           | 396     | 1.12            | 0.93, 1.35          | 0.2     | 4,533                           | 745     | 1.23            | 1.07, 1.42          | 0.003   | 10,942                           | 3,377   | 1.07            | 1.01, 1.13          | 0.017   |
| BMI/IQR                                          | 4,322                           | 396     | 0.57            | 0.30, 1.07          | 0.081   | 4,533                           | 745     | 0.79            | 0.44, 1.42          | 0.4     | 10,942                           | 3,377   | 0.68            | 0.55, 0.84          | <0.001  |
| BMI*BMI/IQR                                      | 4,322                           | 396     | 1.88            | 1.16, 3.06          | 0.011   | 4,533                           | 745     | 1.39            | 0.85, 2.26          | 0.2     | 10,942                           | 3,377   | 1.50            | 1.25, 1.80          | <0.001  |
| Exercise Vital Sign (median)/IQR                 | 4,322                           | 396     | 0.92            | 0.83, 1.02          | 0.10    | 4,533                           | 745     | 0.93            | 0.85, 1.01          | 0.081   | 10,942                           | 3,377   | 0.98            | 0.94, 1.02          | 0.3     |
| Percent housing units with >1 occupants per room | 4,322                           | 396     | 0.66            | 0.16, 2.68          | 0.6     | 4,533                           | 745     | 0.75            | 0.27, 2.09          | 0.6     | 10,942                           | 3,377   | 1.20            | 0.79, 1.82          | 0.4     |



| Characteristic        | Number of COPD, CVD, HTN, DM: 0 |         |                 |                     |         | Number of COPD, CVD, HTN, DM: 1 |         |                 |                     |         | Number of COPD, CVD, HTN, DM: 2+ |         |                 |                     |         |
|-----------------------|---------------------------------|---------|-----------------|---------------------|---------|---------------------------------|---------|-----------------|---------------------|---------|----------------------------------|---------|-----------------|---------------------|---------|
|                       | N                               | Event N | HR <sup>1</sup> | 95% CI <sup>1</sup> | p-value | N                               | Event N | HR <sup>1</sup> | 95% CI <sup>1</sup> | p-value | N                                | Event N | HR <sup>1</sup> | 95% CI <sup>1</sup> | p-value |
| NDI_ACS2013           | 4,322                           | 396     | 1.23            | 1.04, 1.45          | 0.013   | 4,533                           | 745     | 1.07            | 0.95, 1.20          | 0.2     | 10,942                           | 3,377   | 1.02            | 0.97, 1.07          | 0.5     |
| Relative humidity (%) | 4,322                           | 396     | 0.98            | 0.97, 0.99          | <0.001  | 4,533                           | 745     | 0.98            | 0.97, 0.99          | <0.001  | 10,942                           | 3,377   | 0.99            | 0.99, 0.99          | <0.001  |
| Temperature (C)       | 4,322                           | 396     | 0.98            | 0.96, 1.01          | 0.2     | 4,533                           | 745     | 0.99            | 0.97, 1.01          | 0.2     | 10,942                           | 3,377   | 0.98            | 0.98, 0.99          | <0.001  |

<sup>1</sup>HR = Hazard Ratio, CI = Confidence Interval

## [1] "Q for pm2\_5tracer1\_stdigr is: 3.079, df is: 3, and p value is: 0.38"

| Characteristic                                   | Number of COPD, CVD, HTN, DM: 0 |         |                 |                     |         | Number of COPD, CVD, HTN, DM: 1 |         |                 |                     |         | Number of COPD, CVD, HTN, DM: 2+ |         |                 |                     |         |
|--------------------------------------------------|---------------------------------|---------|-----------------|---------------------|---------|---------------------------------|---------|-----------------|---------------------|---------|----------------------------------|---------|-----------------|---------------------|---------|
|                                                  | N                               | Event N | HR <sup>1</sup> | 95% CI <sup>1</sup> | p-value | N                               | Event N | HR <sup>1</sup> | 95% CI <sup>1</sup> | p-value | N                                | Event N | HR <sup>1</sup> | 95% CI <sup>1</sup> | p-value |
| Biomass combustion PM <sub>2.5</sub> /IQR        | 4,418                           | 403     | 0.80            | 0.71, 0.92          | 0.001   | 4,568                           | 750     | 1.09            | 0.98, 1.22          | 0.11    | 10,989                           | 3,392   | 0.99            | 0.95, 1.03          | 0.7     |
| BMI/IQR                                          | 4,418                           | 403     | 0.57            | 0.30, 1.09          | 0.089   | 4,568                           | 750     | 0.80            | 0.44, 1.46          | 0.5     | 10,989                           | 3,392   | 0.70            | 0.57, 0.86          | <0.001  |
| BMI*BMI/IQR                                      | 4,418                           | 403     | 1.93            | 1.18, 3.15          | 0.009   | 4,568                           | 750     | 1.39            | 0.85, 2.28          | 0.2     | 10,989                           | 3,392   | 1.48            | 1.23, 1.77          | <0.001  |
| Percent housing units with >1 occupants per room | 4,418                           | 403     | 0.76            | 0.20, 2.86          | 0.7     | 4,568                           | 750     | 0.79            | 0.29, 2.14          | 0.6     | 10,989                           | 3,392   | 1.32            | 0.88, 1.99          | 0.2     |
| NDI_ACS2013                                      | 4,418                           | 403     | 1.28            | 1.10, 1.50          | 0.002   | 4,568                           | 750     | 1.07            | 0.96, 1.20          | 0.2     | 10,989                           | 3,392   | 1.02            | 0.97, 1.07          | 0.4     |
| Relative humidity (%)                            | 4,418                           | 403     | 0.98            | 0.97, 0.99          | <0.001  | 4,568                           | 750     | 0.98            | 0.97, 0.99          | <0.001  | 10,989                           | 3,392   | 0.99            | 0.99, 0.99          | <0.001  |

<sup>1</sup>HR = Hazard Ratio, CI = Confidence Interval

## [1] "Q for pm2\_5tracer6\_stdigr is: 8.424, df is: 3, and p value is: 0.038"

| Characteristic              | Number of COPD, CVD, HTN, DM: 0 |         |                 |                     |         | Number of COPD, CVD, HTN, DM: 1 |         |                 |                     |         | Number of COPD, CVD, HTN, DM: 2+ |         |                 |                     |         |
|-----------------------------|---------------------------------|---------|-----------------|---------------------|---------|---------------------------------|---------|-----------------|---------------------|---------|----------------------------------|---------|-----------------|---------------------|---------|
|                             | N                               | Event N | HR <sup>1</sup> | 95% CI <sup>1</sup> | p-value | N                               | Event N | HR <sup>1</sup> | 95% CI <sup>1</sup> | p-value | N                                | Event N | HR <sup>1</sup> | 95% CI <sup>1</sup> | p-value |
| Relative humidity (%) / IQR | 4,841                           | 445     | 0.63            | 0.52, 0.76          | <0.001  | 4,786                           | 786     | 0.68            | 0.59, 0.78          | <0.001  | 11,372                           | 3,523   | 0.86            | 0.81, 0.91          | <0.001  |
| Temperature (C)             | 4,841                           | 445     | 0.99            | 0.97, 1.01          | 0.3     | 4,786                           | 786     | 0.99            | 0.97, 1.01          | 0.2     | 11,372                           | 3,523   | 0.99            | 0.98, 0.99          | <0.001  |

<sup>1</sup>HR = Hazard Ratio, CI = Confidence Interval

## [1] "Q for rmax\_k\_stdigr is: 12.99, df is: 3, and p value is: 0.005"

| Characteristic        | Number of COPD, CVD, HTN, DM: 0 |         |                 |                     |         | Number of COPD, CVD, HTN, DM: 1 |         |                 |                     |         | Number of COPD, CVD, HTN, DM: 2+ |         |                 |                     |         |
|-----------------------|---------------------------------|---------|-----------------|---------------------|---------|---------------------------------|---------|-----------------|---------------------|---------|----------------------------------|---------|-----------------|---------------------|---------|
|                       | N                               | Event N | HR <sup>1</sup> | 95% CI <sup>1</sup> | p-value | N                               | Event N | HR <sup>1</sup> | 95% CI <sup>1</sup> | p-value | N                                | Event N | HR <sup>1</sup> | 95% CI <sup>1</sup> | p-value |
| Temperature (C)/IQR   | 4,841                           | 445     | 0.94            | 0.84, 1.05          | 0.3     | 4,786                           | 786     | 0.95            | 0.87, 1.04          | 0.2     | 11,372                           | 3,523   | 0.93            | 0.90, 0.97          | <0.001  |
| Relative humidity (%) | 4,841                           | 445     | 0.98            | 0.97, 0.99          | <0.001  | 4,786                           | 786     | 0.98            | 0.98, 0.99          | <0.001  | 11,372                           | 3,523   | 0.99            | 0.99, 1.00          | <0.001  |

<sup>1</sup>HR = Hazard Ratio, CI = Confidence Interval

## [1] "Q for tmmx\_c\_stdiqr is: 0.13, df is: 3, and p value is: 0.988"

## Stratification by age

Table 8: Stratification by age

| Characteristic                   | [18, 53)        |                     |         | [53, 65)        |                     |         | [65, 76)        |                     |         | [76,105]        |                     |         |
|----------------------------------|-----------------|---------------------|---------|-----------------|---------------------|---------|-----------------|---------------------|---------|-----------------|---------------------|---------|
|                                  | HR <sup>1</sup> | 95% CI <sup>1</sup> | p-value | HR <sup>1</sup> | 95% CI <sup>1</sup> | p-value | HR <sup>1</sup> | 95% CI <sup>1</sup> | p-value | HR <sup>1</sup> | 95% CI <sup>1</sup> | p-value |
| NO <sub>2</sub> /IQR             | 0.99            | 0.80, 1.22          | >0.9    | 1.19            | 1.05, 1.35          | 0.007   | 1.16            | 1.05, 1.28          | 0.004   | 1.05            | 0.97, 1.13          | 0.2     |
| BMI/IQR                          | 1.25            | 0.69, 2.27          | 0.5     | 1.11            | 0.65, 1.90          | 0.7     | 1.12            | 0.73, 1.71          | 0.6     | 0.47            | 0.34, 0.67          | <0.001  |
| BMI*BMI/IQR                      | 1.04            | 0.67, 1.61          | 0.9     | 1.01            | 0.64, 1.57          | >0.9    | 0.97            | 0.67, 1.42          | 0.9     | 1.99            | 1.41, 2.82          | <0.001  |
| Exercise Vital Sign (median)/IQR | 0.90            | 0.81, 1.01          | 0.078   | 0.92            | 0.85, 0.99          | 0.023   | 0.96            | 0.90, 1.02          | 0.2     | 0.99            | 0.94, 1.04          | 0.7     |
| NDI_ACS2013                      | 1.04            | 0.92, 1.17          | 0.5     | 1.05            | 0.97, 1.13          | 0.2     | 1.11            | 1.04, 1.17          | <0.001  | 1.00            | 0.95, 1.05          | 0.9     |
| Relative humidity (%)            | 1.00            | 0.99, 1.00          | 0.3     | 0.98            | 0.98, 0.99          | <0.001  | 0.99            | 0.99, 0.99          | <0.001  | 0.99            | 0.99, 1.00          | <0.001  |
| Temperature (C)                  | 0.97            | 0.95, 0.99          | 0.006   | 0.98            | 0.97, 1.00          | 0.013   | 0.98            | 0.97, 0.99          | <0.001  | 0.99            | 0.98, 1.00          | 0.044   |

<sup>1</sup>HR = Hazard Ratio, CI = Confidence Interval

## [1] "Q for NO2\_stdqqr is: 4.896, df is: 4, and p value is: 0.298"

| Characteristic               | [18, 53)        |                     |         | [53, 65)        |                     |         | [65, 76)        |                     |         | [76,105]        |                     |         |
|------------------------------|-----------------|---------------------|---------|-----------------|---------------------|---------|-----------------|---------------------|---------|-----------------|---------------------|---------|
|                              | HR <sup>1</sup> | 95% CI <sup>1</sup> | p-value | HR <sup>1</sup> | 95% CI <sup>1</sup> | p-value | HR <sup>1</sup> | 95% CI <sup>1</sup> | p-value | HR <sup>1</sup> | 95% CI <sup>1</sup> | p-value |
| O <sub>3</sub> (maximum)/IQR | 0.99            | 0.82, 1.20          | >0.9    | 1.05            | 0.92, 1.20          | 0.5     | 0.91            | 0.83, 1.01          | 0.084   | 1.08            | 1.00, 1.17          | 0.063   |
| Relative humidity (%)        | 0.99            | 0.98, 1.00          | 0.011   | 0.99            | 0.98, 0.99          | <0.001  | 0.99            | 0.98, 0.99          | <0.001  | 1.00            | 0.99, 1.00          | 0.018   |

<sup>1</sup>HR = Hazard Ratio, CI = Confidence Interval

## [1] "Q for O3max\_stdqqr is: 6.175, df is: 4, and p value is: 0.186"

| Characteristic               | [18, 53)        |                     |         | [53, 65)        |                     |         | [65, 76)        |                     |         | [76,105]        |                     |         |
|------------------------------|-----------------|---------------------|---------|-----------------|---------------------|---------|-----------------|---------------------|---------|-----------------|---------------------|---------|
|                              | HR <sup>1</sup> | 95% CI <sup>1</sup> | p-value | HR <sup>1</sup> | 95% CI <sup>1</sup> | p-value | HR <sup>1</sup> | 95% CI <sup>1</sup> | p-value | HR <sup>1</sup> | 95% CI <sup>1</sup> | p-value |
| NO <sub>2</sub> /IQR         | 1.00            | 0.80, 1.25          | >0.9    | 1.22            | 1.07, 1.39          | 0.003   | 1.16            | 1.05, 1.28          | 0.004   | 1.06            | 0.98, 1.14          | 0.2     |
| O <sub>3</sub> (maximum)/IQR | 1.04            | 0.83, 1.32          | 0.7     | 1.17            | 1.00, 1.38          | 0.051   | 1.00            | 0.90, 1.13          | >0.9    | 1.12            | 1.03, 1.22          | 0.009   |
| BMI/IQR                      | 1.24            | 0.68, 2.26          | 0.5     | 1.12            | 0.65, 1.91          | 0.7     | 1.12            | 0.73, 1.71          | 0.6     | 0.47            | 0.34, 0.67          | <0.001  |
| BMI*BMI/IQR                  | 1.04            | 0.67, 1.61          | 0.9     | 1.00            | 0.64, 1.56          | >0.9    | 0.97            | 0.67, 1.42          | 0.9     | 1.98            | 1.41, 2.80          | <0.001  |

| Characteristic                   | [18, 53)        |                     |         | [53, 65)        |                     |         | [65, 76)        |                     |         | [76,105]        |                     |         |
|----------------------------------|-----------------|---------------------|---------|-----------------|---------------------|---------|-----------------|---------------------|---------|-----------------|---------------------|---------|
|                                  | HR <sup>1</sup> | 95% CI <sup>1</sup> | p-value | HR <sup>1</sup> | 95% CI <sup>1</sup> | p-value | HR <sup>1</sup> | 95% CI <sup>1</sup> | p-value | HR <sup>1</sup> | 95% CI <sup>1</sup> | p-value |
| Exercise Vital Sign (median)/IQR | 0.90            | 0.81, 1.01          | 0.080   | 0.91            | 0.85, 0.99          | 0.023   | 0.96            | 0.90, 1.02          | 0.2     | 0.99            | 0.94, 1.05          | 0.8     |
| NDI_ACS2013                      | 1.04            | 0.92, 1.18          | 0.5     | 1.06            | 0.98, 1.14          | 0.2     | 1.11            | 1.04, 1.17          | 0.001   | 1.00            | 0.95, 1.05          | >0.9    |
| Relative humidity (%)            | 1.00            | 0.99, 1.01          | 0.5     | 0.99            | 0.98, 1.00          | 0.003   | 0.99            | 0.99, 1.00          | <0.001  | 1.00            | 0.99, 1.00          | 0.080   |
| Temperature (C)                  | 0.97            | 0.94, 0.99          | 0.007   | 0.98            | 0.96, 0.99          | 0.004   | 0.98            | 0.97, 0.99          | <0.001  | 0.99            | 0.98, 1.00          | 0.010   |

<sup>1</sup>HR = Hazard Ratio, CI = Confidence Interval

## [1] "Q for NO2\_stdqir is: 5.03, df is: 4, and p value is: 0.284"

| Characteristic               | [18, 53)        |                     |         | [53, 65)        |                     |         | [65, 76)        |                     |         | [76,105]        |                     |         |
|------------------------------|-----------------|---------------------|---------|-----------------|---------------------|---------|-----------------|---------------------|---------|-----------------|---------------------|---------|
|                              | HR <sup>1</sup> | 95% CI <sup>1</sup> | p-value | HR <sup>1</sup> | 95% CI <sup>1</sup> | p-value | HR <sup>1</sup> | 95% CI <sup>1</sup> | p-value | HR <sup>1</sup> | 95% CI <sup>1</sup> | p-value |
| PM <sub>2.5</sub> (mass)/IQR | 1.20            | 1.01, 1.43          | 0.039   | 1.22            | 1.10, 1.36          | <0.001  | 1.10            | 1.02, 1.19          | 0.014   | 1.07            | 1.01, 1.14          | 0.030   |
| Temperature (C)              | 0.96            | 0.94, 0.98          | <0.001  | 0.97            | 0.95, 0.98          | <0.001  | 0.97            | 0.96, 0.98          | <0.001  | 0.99            | 0.98, 1.00          | 0.004   |

<sup>1</sup>HR = Hazard Ratio, CI = Confidence Interval

## [1] "Q for pm2\_5mass\_stdqir is: 5.739, df is: 4, and p value is: 0.22"

| Characteristic               | [18, 53)        |                     |         | [53, 65)        |                     |         | [65, 76)        |                     |         | [76,105]        |                     |         |
|------------------------------|-----------------|---------------------|---------|-----------------|---------------------|---------|-----------------|---------------------|---------|-----------------|---------------------|---------|
|                              | HR <sup>1</sup> | 95% CI <sup>1</sup> | p-value | HR <sup>1</sup> | 95% CI <sup>1</sup> | p-value | HR <sup>1</sup> | 95% CI <sup>1</sup> | p-value | HR <sup>1</sup> | 95% CI <sup>1</sup> | p-value |
| PM <sub>2.5</sub> (mass)/IQR | 1.19            | 0.99, 1.43          | 0.059   | 1.18            | 1.07, 1.32          | 0.002   | 1.11            | 1.03, 1.20          | 0.009   | 1.05            | 0.98, 1.12          | 0.2     |
| O <sub>3</sub> (maximum)/IQR | 0.98            | 0.79, 1.22          | 0.9     | 1.03            | 0.88, 1.20          | 0.7     | 0.92            | 0.81, 1.03          | 0.14    | 1.09            | 0.99, 1.19          | 0.073   |
| Temperature (C)              | 0.97            | 0.95, 0.99          | 0.005   | 0.98            | 0.96, 0.99          | 0.006   | 0.98            | 0.97, 0.99          | <0.001  | 0.99            | 0.98, 1.00          | 0.016   |
| Relative humidity (%)        | 0.99            | 0.98, 1.00          | 0.11    | 0.99            | 0.98, 1.00          | 0.001   | 0.99            | 0.99, 1.00          | <0.001  | 1.00            | 0.99, 1.00          | 0.094   |

<sup>1</sup>HR = Hazard Ratio, CI = Confidence Interval

## [1] "Q for pm2\_5mass\_stdqir is: 5.131, df is: 4, and p value is: 0.274"

| Characteristic                   | [18, 53)        |                     |         | [53, 65)        |                     |         | [65, 76)        |                     |         | [76,105]        |                     |         |
|----------------------------------|-----------------|---------------------|---------|-----------------|---------------------|---------|-----------------|---------------------|---------|-----------------|---------------------|---------|
|                                  | HR <sup>1</sup> | 95% CI <sup>1</sup> | p-value | HR <sup>1</sup> | 95% CI <sup>1</sup> | p-value | HR <sup>1</sup> | 95% CI <sup>1</sup> | p-value | HR <sup>1</sup> | 95% CI <sup>1</sup> | p-value |
| PM <sub>2.5</sub> (nitrates)/IQR | 1.17            | 0.98, 1.40          | 0.075   | 1.26            | 1.13, 1.41          | <0.001  | 1.10            | 1.01, 1.19          | 0.022   | 1.07            | 1.00, 1.14          | 0.048   |

| Characteristic  | [18, 53)        |                     |         | [53, 65)        |                     |         | [65, 76)        |                     |         | [76,105]        |                     |         |
|-----------------|-----------------|---------------------|---------|-----------------|---------------------|---------|-----------------|---------------------|---------|-----------------|---------------------|---------|
|                 | HR <sup>1</sup> | 95% CI <sup>1</sup> | p-value | HR <sup>1</sup> | 95% CI <sup>1</sup> | p-value | HR <sup>1</sup> | 95% CI <sup>1</sup> | p-value | HR <sup>1</sup> | 95% CI <sup>1</sup> | p-value |
| Temperature (C) | 0.96            | 0.94, 0.98          | <0.001  | 0.96            | 0.95, 0.98          | <0.001  | 0.97            | 0.96, 0.98          | <0.001  | 0.99            | 0.98, 1.00          | 0.003   |

<sup>1</sup>HR = Hazard Ratio, CI = Confidence Interval

## [1] "Q for pm2\_5n\_v\_stdqtr is: 8.318, df is: 4, and p value is: 0.081"

| Characteristic                                   | [18, 53)        |                     |         | [53, 65)        |                     |         | [65, 76)        |                     |         | [76,105]        |                     |         |
|--------------------------------------------------|-----------------|---------------------|---------|-----------------|---------------------|---------|-----------------|---------------------|---------|-----------------|---------------------|---------|
|                                                  | HR <sup>1</sup> | 95% CI <sup>1</sup> | p-value | HR <sup>1</sup> | 95% CI <sup>1</sup> | p-value | HR <sup>1</sup> | 95% CI <sup>1</sup> | p-value | HR <sup>1</sup> | 95% CI <sup>1</sup> | p-value |
| PM <sub>2.5</sub> (organic carbon)/IQR           | 1.09            | 0.88, 1.36          | 0.4     | 1.08            | 0.96, 1.22          | 0.2     | 1.07            | 0.99, 1.17          | 0.11    | 1.01            | 0.94, 1.08          | 0.9     |
| BMI/IQR                                          | 1.26            | 0.69, 2.29          | 0.5     | 1.13            | 0.66, 1.94          | 0.7     | 1.11            | 0.73, 1.69          | 0.6     | 0.47            | 0.33, 0.67          | <0.001  |
| BMI*BMI/IQR                                      | 1.03            | 0.66, 1.60          | 0.9     | 1.00            | 0.64, 1.57          | >0.9    | 0.98            | 0.68, 1.42          | >0.9    | 2.00            | 1.41, 2.83          | <0.001  |
| Exercise Vital Sign (median)/IQR                 | 0.91            | 0.81, 1.01          | 0.088   | 0.92            | 0.85, 0.99          | 0.026   | 0.96            | 0.91, 1.02          | 0.2     | 0.99            | 0.94, 1.04          | 0.7     |
| Percent housing units with >1 occupants per room | 0.79            | 0.21, 2.91          | 0.7     | 1.75            | 0.86, 3.55          | 0.12    | 0.87            | 0.46, 1.62          | 0.7     | 0.89            | 0.51, 1.56          | 0.7     |
| NDI_ACS2013                                      | 1.04            | 0.90, 1.21          | 0.6     | 1.01            | 0.93, 1.11          | 0.8     | 1.13            | 1.05, 1.21          | 0.001   | 1.01            | 0.95, 1.07          | 0.7     |
| Relative humidity (%)                            | 0.99            | 0.99, 1.00          | 0.2     | 0.99            | 0.98, 0.99          | <0.001  | 0.99            | 0.99, 1.00          | <0.001  | 0.99            | 0.99, 1.00          | <0.001  |
| Temperature (C)                                  | 0.97            | 0.95, 0.99          | 0.007   | 0.98            | 0.97, 1.00          | 0.015   | 0.98            | 0.97, 0.99          | <0.001  | 0.99            | 0.98, 1.00          | 0.047   |

<sup>1</sup>HR = Hazard Ratio, CI = Confidence Interval

## [1] "Q for pm2\_5oc\_stdqtr is: 1.985, df is: 4, and p value is: 0.738"

| Characteristic               | [18, 53)        |                     |         | [53, 65)        |                     |         | [65, 76)        |                     |         | [76,105]        |                     |         |
|------------------------------|-----------------|---------------------|---------|-----------------|---------------------|---------|-----------------|---------------------|---------|-----------------|---------------------|---------|
|                              | HR <sup>1</sup> | 95% CI <sup>1</sup> | p-value | HR <sup>1</sup> | 95% CI <sup>1</sup> | p-value | HR <sup>1</sup> | 95% CI <sup>1</sup> | p-value | HR <sup>1</sup> | 95% CI <sup>1</sup> | p-value |
| PM <sub>0.1</sub> (mass)/IQR | 1.07            | 0.91, 1.26          | 0.4     | 1.09            | 1.01, 1.19          | 0.032   | 1.05            | 0.99, 1.12          | 0.10    | 1.03            | 0.97, 1.09          | 0.3     |
| BMI/IQR                      | 1.27            | 0.71, 2.26          | 0.4     | 1.18            | 0.69, 2.03          | 0.5     | 1.15            | 0.76, 1.74          | 0.5     | 0.50            | 0.35, 0.70          | <0.001  |
| BMI*BMI/IQR                  | 1.04            | 0.68, 1.59          | 0.9     | 0.97            | 0.62, 1.52          | >0.9    | 0.96            | 0.67, 1.39          | 0.8     | 1.92            | 1.35, 2.74          | <0.001  |
| NDI_ACS2013                  | 1.03            | 0.92, 1.16          | 0.6     | 1.04            | 0.96, 1.12          | 0.3     | 1.10            | 1.04, 1.16          | 0.002   | 1.00            | 0.95, 1.04          | 0.9     |
| Temperature (C)              | 0.96            | 0.94, 0.99          | 0.002   | 0.97            | 0.96, 0.98          | <0.001  | 0.97            | 0.96, 0.98          | <0.001  | 0.99            | 0.98, 1.00          | 0.005   |

<sup>1</sup>HR = Hazard Ratio, CI = Confidence Interval

## [1] "Q for pm0\_1mass\_stdiqr is: 1.887, df is: 4, and p value is: 0.756"

| Characteristic                           | [18, 53)        |                     |         | [53, 65)        |                     |         | [65, 76)        |                     |         | [76,105]        |                     |         |
|------------------------------------------|-----------------|---------------------|---------|-----------------|---------------------|---------|-----------------|---------------------|---------|-----------------|---------------------|---------|
|                                          | HR <sup>1</sup> | 95% CI <sup>1</sup> | p-value | HR <sup>1</sup> | 95% CI <sup>1</sup> | p-value | HR <sup>1</sup> | 95% CI <sup>1</sup> | p-value | HR <sup>1</sup> | 95% CI <sup>1</sup> | p-value |
| PM <sub>2.5</sub> (elemental carbon)/IQR | 1.08            | 0.90, 1.29          | 0.4     | 1.17            | 1.05, 1.29          | 0.003   | 1.08            | 1.00, 1.16          | 0.038   | 1.03            | 0.96, 1.10          | 0.4     |
| BMI/IQR                                  | 1.25            | 0.68, 2.28          | 0.5     | 1.12            | 0.65, 1.92          | 0.7     | 1.12            | 0.73, 1.70          | 0.6     | 0.47            | 0.34, 0.67          | <0.001  |
| BMI*BMI/IQR                              | 1.03            | 0.67, 1.60          | 0.9     | 1.00            | 0.64, 1.57          | >0.9    | 0.97            | 0.67, 1.42          | 0.9     | 1.99            | 1.41, 2.82          | <0.001  |
| Exercise Vital Sign (median)/IQR         | 0.90            | 0.81, 1.01          | 0.084   | 0.92            | 0.85, 0.99          | 0.025   | 0.96            | 0.91, 1.02          | 0.2     | 0.99            | 0.94, 1.04          | 0.7     |
| NDI_ACS2013                              | 1.03            | 0.91, 1.16          | 0.6     | 1.06            | 0.98, 1.14          | 0.2     | 1.12            | 1.06, 1.19          | <0.001  | 1.00            | 0.95, 1.05          | >0.9    |
| Relative humidity (%)                    | 0.99            | 0.99, 1.00          | 0.2     | 0.99            | 0.98, 0.99          | <0.001  | 0.99            | 0.99, 1.00          | <0.001  | 0.99            | 0.99, 1.00          | <0.001  |
| Temperature (C)                          | 0.97            | 0.95, 0.99          | 0.005   | 0.98            | 0.97, 0.99          | 0.008   | 0.98            | 0.97, 0.99          | <0.001  | 0.99            | 0.98, 1.00          | 0.043   |

<sup>1</sup>HR = Hazard Ratio, CI = Confidence Interval

## [1] "Q for pm2\_5sec\_stdiqr is: 4.505, df is: 4, and p value is: 0.342"

| Characteristic                        | [18, 53)        |                     |         | [53, 65)        |                     |         | [65, 76)        |                     |         | [76,105]        |                     |         |
|---------------------------------------|-----------------|---------------------|---------|-----------------|---------------------|---------|-----------------|---------------------|---------|-----------------|---------------------|---------|
|                                       | HR <sup>1</sup> | 95% CI <sup>1</sup> | p-value | HR <sup>1</sup> | 95% CI <sup>1</sup> | p-value | HR <sup>1</sup> | 95% CI <sup>1</sup> | p-value | HR <sup>1</sup> | 95% CI <sup>1</sup> | p-value |
| On-road diesel PM <sub>2.5</sub> /IQR | 1.06            | 0.92, 1.21          | 0.4     | 1.10            | 1.01, 1.19          | 0.029   | 1.06            | 1.00, 1.12          | 0.039   | 1.05            | 1.00, 1.11          | 0.062   |
| BMI/IQR                               | 1.30            | 0.73, 2.34          | 0.4     | 1.19            | 0.69, 2.04          | 0.5     | 1.14            | 0.75, 1.73          | 0.5     | 0.49            | 0.35, 0.69          | <0.001  |
| BMI*BMI/IQR                           | 1.02            | 0.66, 1.56          | >0.9    | 0.97            | 0.62, 1.51          | 0.9     | 0.96            | 0.67, 1.39          | 0.8     | 1.94            | 1.37, 2.75          | <0.001  |
| Relative humidity (%)                 | 0.99            | 0.99, 1.00          | 0.2     | 0.99            | 0.98, 0.99          | <0.001  | 0.99            | 0.99, 1.00          | <0.001  | 0.99            | 0.99, 1.00          | <0.001  |
| Temperature (C)                       | 0.97            | 0.95, 0.99          | 0.006   | 0.98            | 0.97, 1.00          | 0.011   | 0.98            | 0.97, 0.99          | <0.001  | 0.99            | 0.98, 1.00          | 0.047   |

<sup>1</sup>HR = Hazard Ratio, CI = Confidence Interval

## [1] "Q for pm2\_5tracer3\_stdiqr is: 0.865, df is: 4, and p value is: 0.93"

| Characteristic                          | [18, 53)        |                     |         | [53, 65)        |                     |         | [65, 76)        |                     |         | [76,105]        |                     |         |
|-----------------------------------------|-----------------|---------------------|---------|-----------------|---------------------|---------|-----------------|---------------------|---------|-----------------|---------------------|---------|
|                                         | HR <sup>1</sup> | 95% CI <sup>1</sup> | p-value | HR <sup>1</sup> | 95% CI <sup>1</sup> | p-value | HR <sup>1</sup> | 95% CI <sup>1</sup> | p-value | HR <sup>1</sup> | 95% CI <sup>1</sup> | p-value |
| On-road gasoline PM <sub>2.5</sub> /IQR | 1.02            | 0.85, 1.21          | 0.9     | 1.13            | 1.01, 1.25          | 0.031   | 1.10            | 1.01, 1.19          | 0.023   | 1.04            | 0.98, 1.12          | 0.2     |
| BMI/IQR                                 | 1.25            | 0.69, 2.27          | 0.5     | 1.13            | 0.66, 1.94          | 0.7     | 1.11            | 0.72, 1.69          | 0.6     | 0.47            | 0.33, 0.67          | <0.001  |

| Characteristic                                   | [18, 53)        |                     |         | [53, 65)        |                     |         | [65, 76)        |                     |         | [76,105]        |                     |         |
|--------------------------------------------------|-----------------|---------------------|---------|-----------------|---------------------|---------|-----------------|---------------------|---------|-----------------|---------------------|---------|
|                                                  | HR <sup>1</sup> | 95% CI <sup>1</sup> | p-value | HR <sup>1</sup> | 95% CI <sup>1</sup> | p-value | HR <sup>1</sup> | 95% CI <sup>1</sup> | p-value | HR <sup>1</sup> | 95% CI <sup>1</sup> | p-value |
| BMI*BMI/IQR                                      | 1.04            | 0.67, 1.61          | 0.9     | 1.00            | 0.64, 1.57          | >0.9    | 0.98            | 0.68, 1.43          | >0.9    | 2.00            | 1.41, 2.83          | <0.001  |
| Exercise Vital Sign (median)/IQR                 | 0.90            | 0.81, 1.01          | 0.081   | 0.92            | 0.85, 0.99          | 0.023   | 0.96            | 0.90, 1.02          | 0.2     | 0.99            | 0.94, 1.04          | 0.7     |
| Percent housing units with >1 occupants per room | 0.81            | 0.22, 2.96          | 0.7     | 1.66            | 0.82, 3.36          | 0.2     | 0.82            | 0.43, 1.56          | 0.5     | 0.86            | 0.49, 1.52          | 0.6     |
| NDI_ACS2013                                      | 1.05            | 0.91, 1.22          | 0.5     | 1.02            | 0.93, 1.12          | 0.7     | 1.13            | 1.05, 1.22          | <0.001  | 1.01            | 0.95, 1.07          | 0.7     |
| Relative humidity (%)                            | 1.00            | 0.99, 1.00          | 0.3     | 0.98            | 0.98, 0.99          | <0.001  | 0.99            | 0.99, 0.99          | <0.001  | 0.99            | 0.99, 1.00          | <0.001  |
| Temperature (C)                                  | 0.97            | 0.95, 0.99          | 0.006   | 0.98            | 0.97, 1.00          | 0.012   | 0.98            | 0.97, 0.99          | <0.001  | 0.99            | 0.98, 1.00          | 0.043   |

<sup>1</sup>HR = Hazard Ratio, CI = Confidence Interval

## [1] "Q for pm2\_5tracer1\_stdigr is: 2.172, df is: 4, and p value is: 0.704"

| Characteristic                                   | [18, 53)        |                     |         | [53, 65)        |                     |         | [65, 76)        |                     |         | [76,105]        |                     |         |
|--------------------------------------------------|-----------------|---------------------|---------|-----------------|---------------------|---------|-----------------|---------------------|---------|-----------------|---------------------|---------|
|                                                  | HR <sup>1</sup> | 95% CI <sup>1</sup> | p-value | HR <sup>1</sup> | 95% CI <sup>1</sup> | p-value | HR <sup>1</sup> | 95% CI <sup>1</sup> | p-value | HR <sup>1</sup> | 95% CI <sup>1</sup> | p-value |
| Biomass combustion PM <sub>2.5</sub> /IQR        | 1.07            | 0.92, 1.25          | 0.4     | 0.95            | 0.88, 1.04          | 0.3     | 1.00            | 0.95, 1.06          | 0.9     | 1.00            | 0.96, 1.05          | 0.8     |
| BMI/IQR                                          | 1.25            | 0.71, 2.19          | 0.4     | 1.21            | 0.71, 2.05          | 0.5     | 1.15            | 0.75, 1.76          | 0.5     | 0.49            | 0.35, 0.69          | <0.001  |
| BMI*BMI/IQR                                      | 1.06            | 0.70, 1.58          | 0.8     | 0.97            | 0.63, 1.50          | 0.9     | 0.96            | 0.66, 1.40          | 0.8     | 1.92            | 1.37, 2.70          | <0.001  |
| Percent housing units with >1 occupants per room | 0.70            | 0.19, 2.63          | 0.6     | 1.95            | 0.96, 3.95          | 0.063   | 0.95            | 0.51, 1.77          | 0.9     | 0.95            | 0.55, 1.65          | 0.9     |
| NDI_ACS2013                                      | 1.06            | 0.91, 1.22          | 0.5     | 1.02            | 0.94, 1.12          | 0.6     | 1.13            | 1.05, 1.22          | <0.001  | 1.01            | 0.95, 1.07          | 0.8     |
| Relative humidity (%)                            | 0.99            | 0.98, 1.00          | 0.031   | 0.99            | 0.98, 0.99          | <0.001  | 0.99            | 0.99, 0.99          | <0.001  | 0.99            | 0.99, 1.00          | <0.001  |

<sup>1</sup>HR = Hazard Ratio, CI = Confidence Interval

## [1] "Q for pm2\_5tracer6\_stdigr is: 2.234, df is: 4, and p value is: 0.693"

| Characteristic            | [18, 53)        |                     |         | [53, 65)        |                     |         | [65, 76)        |                     |         | [76,105]        |                     |         |
|---------------------------|-----------------|---------------------|---------|-----------------|---------------------|---------|-----------------|---------------------|---------|-----------------|---------------------|---------|
|                           | HR <sup>1</sup> | 95% CI <sup>1</sup> | p-value | HR <sup>1</sup> | 95% CI <sup>1</sup> | p-value | HR <sup>1</sup> | 95% CI <sup>1</sup> | p-value | HR <sup>1</sup> | 95% CI <sup>1</sup> | p-value |
| Relative humidity (%)/IQR | 0.84            | 0.70, 0.99          | 0.043   | 0.74            | 0.66, 0.83          | <0.001  | 0.84            | 0.77, 0.92          | <0.001  | 0.88            | 0.82, 0.94          | <0.001  |
| Temperature (C)           | 0.97            | 0.95, 0.99          | 0.006   | 0.98            | 0.97, 1.00          | 0.022   | 0.98            | 0.97, 0.99          | <0.001  | 0.99            | 0.98, 1.00          | 0.065   |

<sup>1</sup>HR = Hazard Ratio, CI = Confidence Interval

## [1] "Q for rmax\_k\_stdiqr is: 6.136, df is: 4, and p value is: 0.189"

| Characteristic        | [18, 53)        |                     |         | [53, 65)        |                     |         | [65, 76)        |                     |         | [76,105]        |                     |         |
|-----------------------|-----------------|---------------------|---------|-----------------|---------------------|---------|-----------------|---------------------|---------|-----------------|---------------------|---------|
|                       | HR <sup>1</sup> | 95% CI <sup>1</sup> | p-value | HR <sup>1</sup> | 95% CI <sup>1</sup> | p-value | HR <sup>1</sup> | 95% CI <sup>1</sup> | p-value | HR <sup>1</sup> | 95% CI <sup>1</sup> | p-value |
| Temperature (C)/IQR   | 0.86            | 0.77, 0.96          | 0.006   | 0.92            | 0.86, 0.99          | 0.022   | 0.90            | 0.85, 0.95          | <0.001  | 0.96            | 0.92, 1.00          | 0.065   |
| Relative humidity (%) | 0.99            | 0.98, 1.00          | 0.043   | 0.99            | 0.98, 0.99          | <0.001  | 0.99            | 0.99, 1.00          | <0.001  | 0.99            | 0.99, 1.00          | <0.001  |

<sup>1</sup>HR = Hazard Ratio, CI = Confidence Interval

## [1] "Q for tmmx\_c\_stdiqr is: 4.9, df is: 4, and p value is: 0.298"



### Stratification by tertile

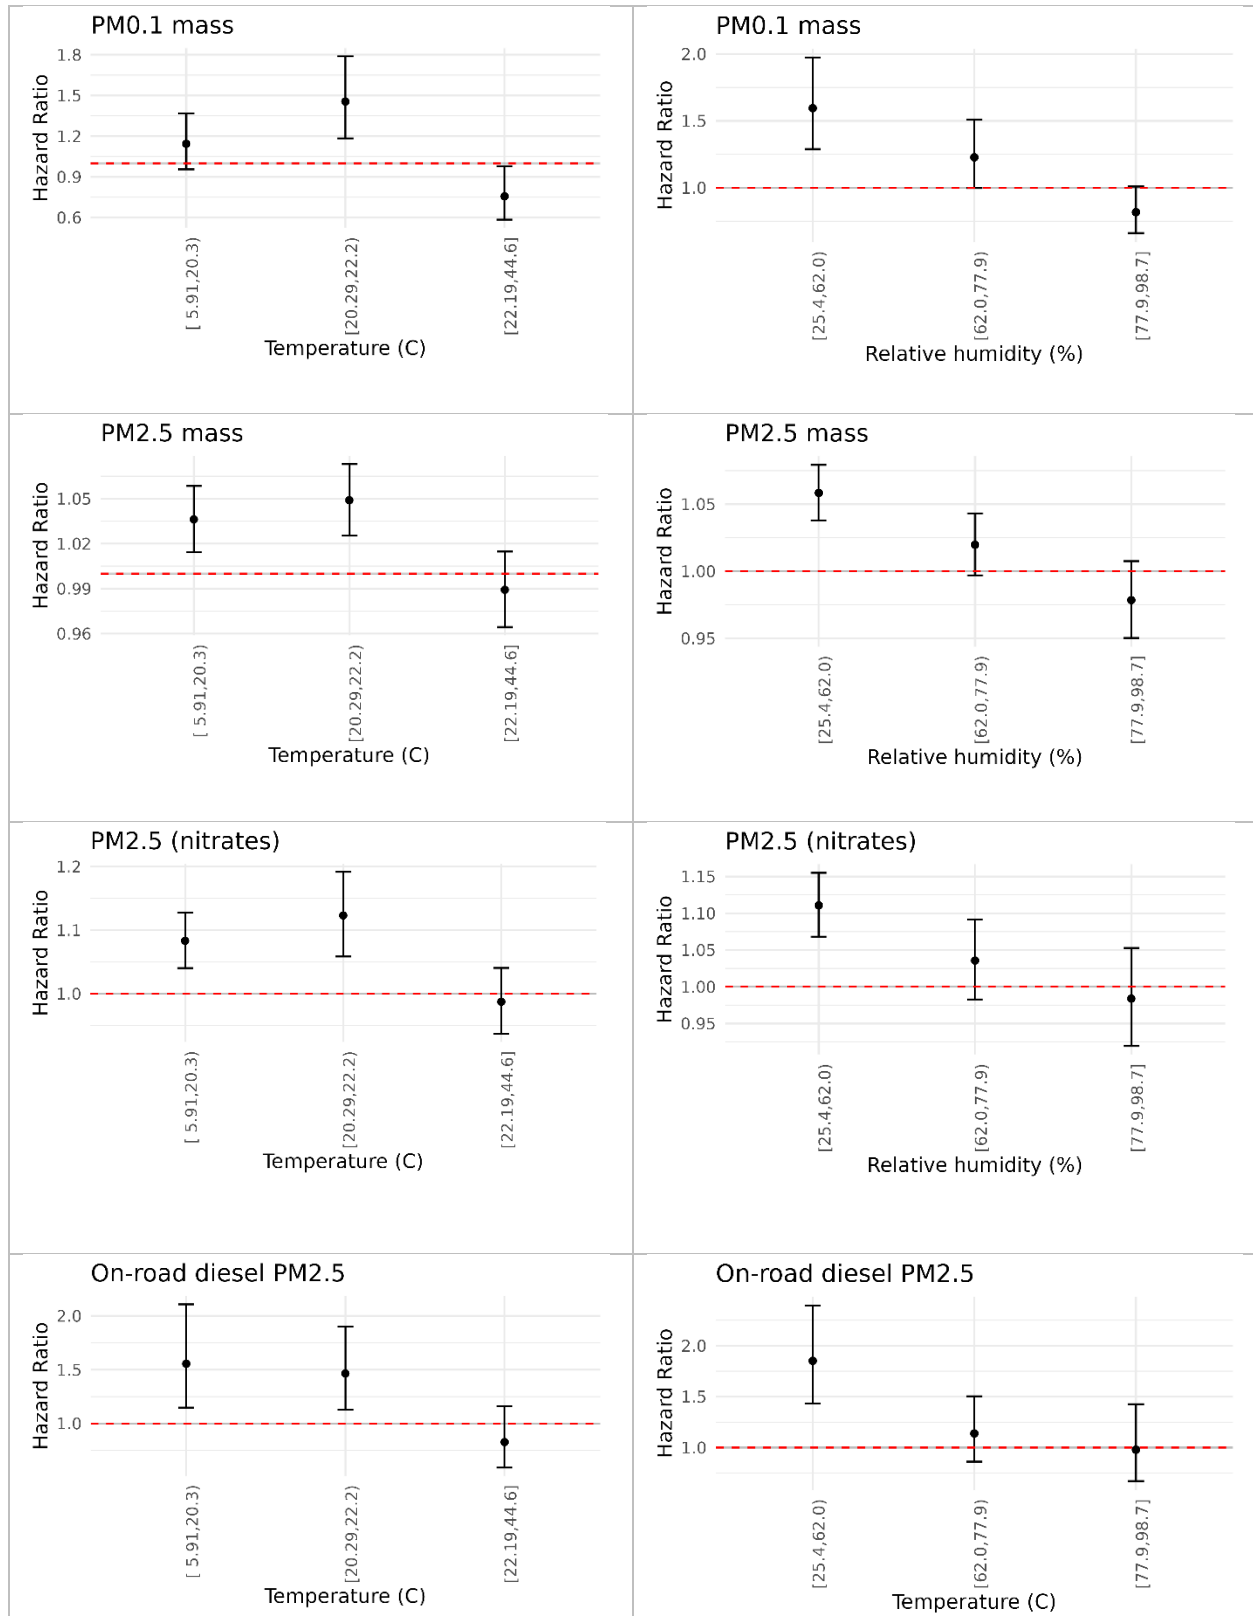

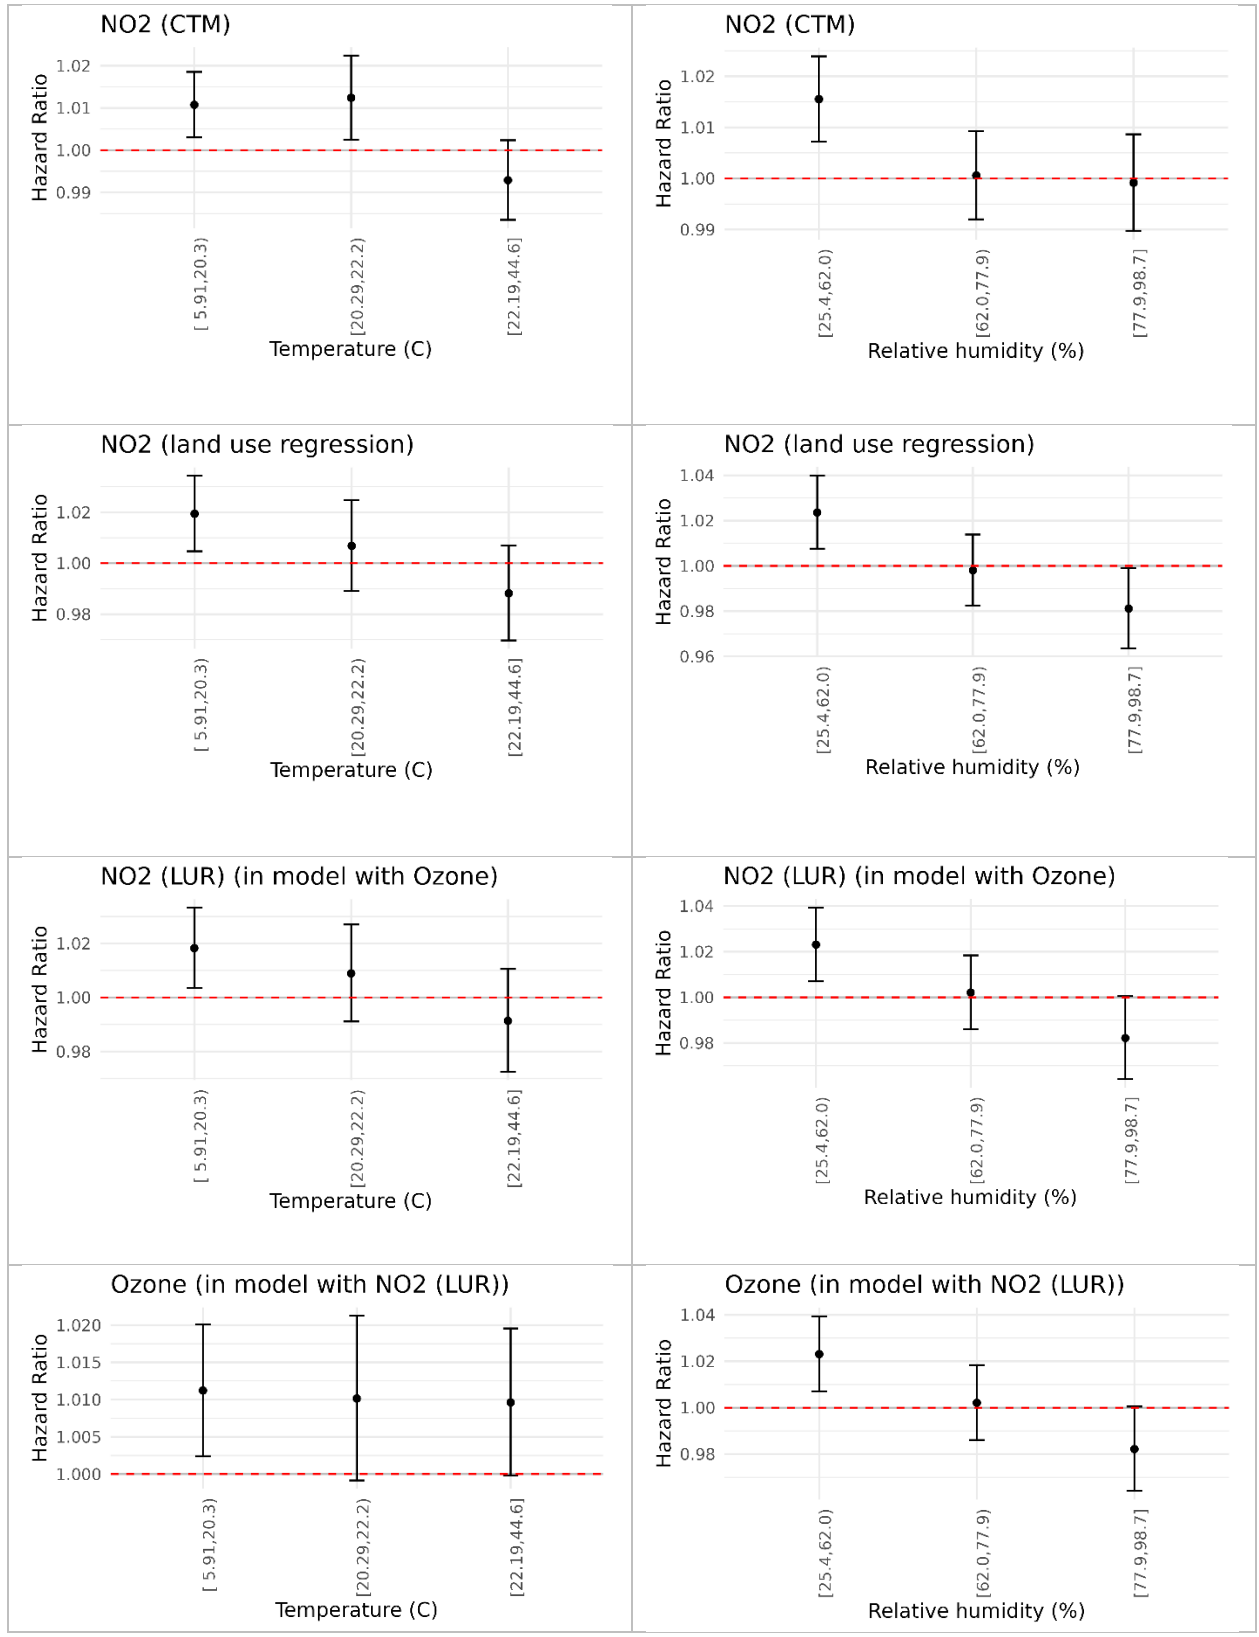

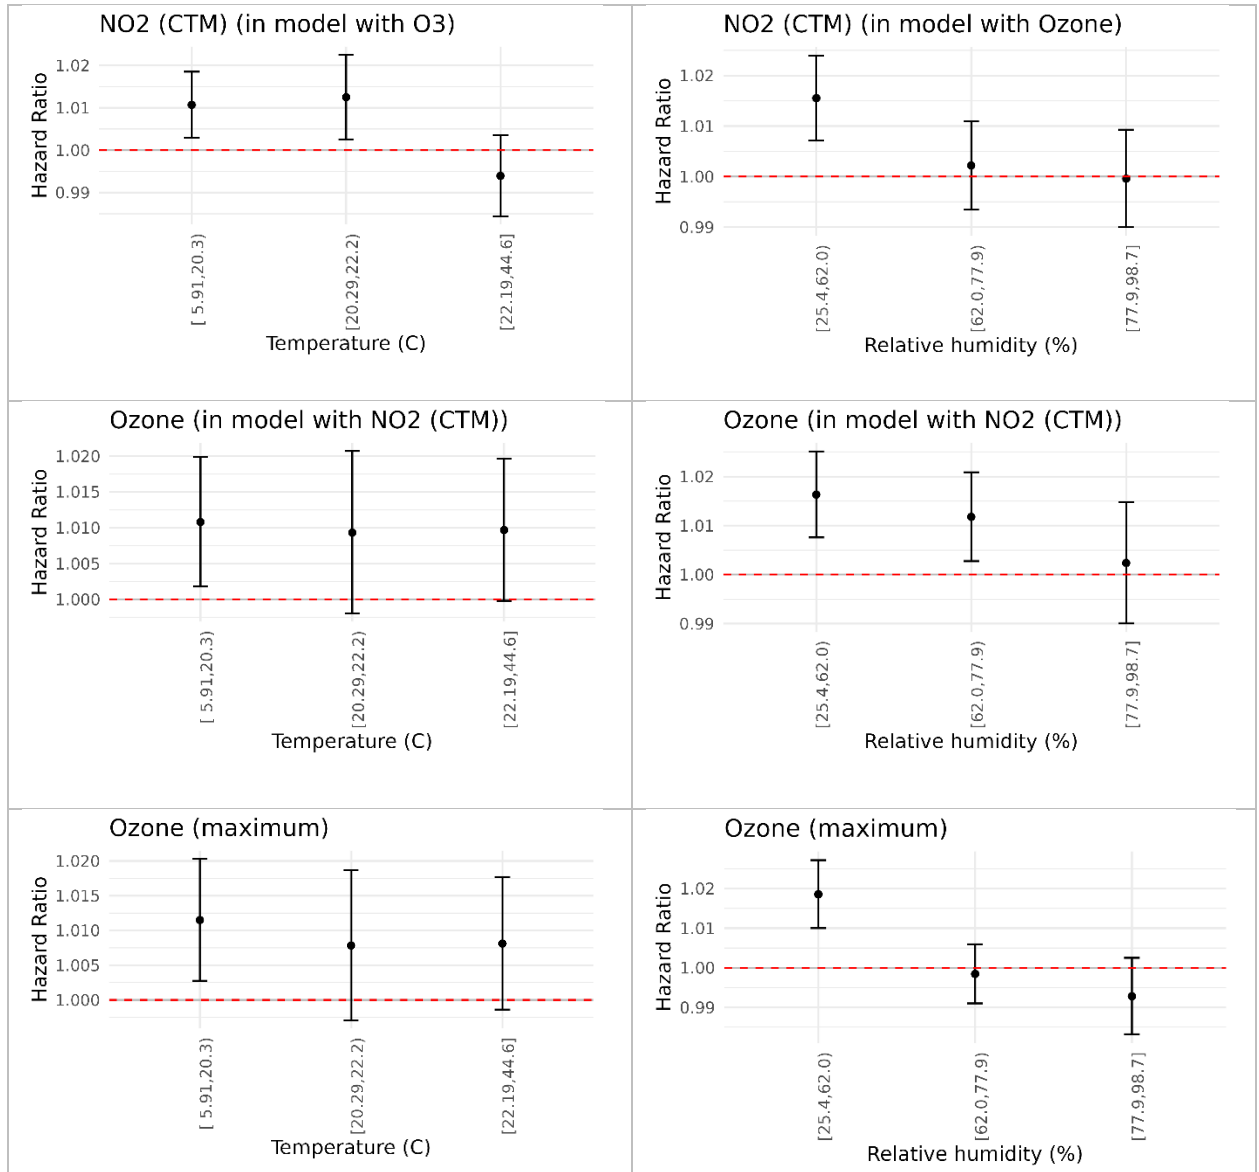

Figure 13: Stratification of significant pollutants by tertile, controlled by temperature and humidity

## Literature Cited in the Online Data Supplement

- 1 Nau C, Bruxvoort K, Navarro RA, *et al.* COVID-19 Inequities Across Multiple Racial and Ethnic Groups: Results From an Integrated Health Care Organization. *Annals of internal medicine* 2021; published online April 20. DOI:10.7326/m20-8283.
- 2 Quan H, Sundararajan V, Halfon P, *et al.* Coding algorithms for defining comorbidities in ICD-9-CM and ICD-10 administrative data. *Medical care* 2005; **43**: 1130–9.
- 3 Held T, Ying Q, Kleeman MJ, Schauer JJ, Fraser MP. A comparison of the UCD/CIT air quality model and the CMB source–receptor model for primary airborne particulate matter. *Atmospheric Environment* 2005; **39**: 2281–97.
- 4 Hu X-M, Zhang Y, Jacobson MZ, Chan CK. Coupling and evaluating gas/particle mass transfer treatments for aerosol simulation and forecast. *Journal of Geophysical Research: Atmospheres* 2008; **113**. DOI:10.1029/2007JD009588.
- 5 Nenes A, Pandis SN, Pilinis C. ISORROPIA: A New Thermodynamic Equilibrium Model for Multiphase Multicomponent Inorganic Aerosols. *Aquatic Geochemistry* 1998; **4**: 123–52.
- 6 Carlton AG, Bhave PV, Napelenok SL, *et al.* Model Representation of Secondary Organic Aerosol in CMAQv4.7. *Environ Sci Technol* 2010; **44**: 8553–60.
- 7 Kleeman MJ, Cass GR, Eldering A. Modeling the airborne particle complex as a source-oriented external mixture. *Journal of Geophysical Research: Atmospheres* 1997; **102**: 21355–72.
- 8 Hu J, Zhang H, Ying Q, Chen S-H, Vandenberghe F, Kleeman MJ. Long-term particulate matter modeling for health effect studies in California – Part 1: Model performance on temporal and spatial variations. *Atmospheric Chemistry and Physics* 2015; **15**: 3445–61.
- 9 Yu X, Venecek M, Hu J, *et al.* Sources of Airborne Ultrafine Particle Number and Mass Concentrations in California. Aerosols/Atmospheric Modelling/Troposphere/Chemistry (chemical composition and reactions), 2018 DOI:10.5194/acp-2018-832.
- 10 Ying Q, Fraser MP, Griffin RJ, Chen J, Kleeman MJ. Verification of a source-oriented externally mixed air quality model during a severe photochemical smog episode. *Atmospheric Environment* 2007; **41**: 1521–38.
- 11 Ying Q, Lu J, Allen P, Livingstone P, Kaduwela A, Kleeman M. Modeling air quality during the California Regional PM10/PM2.5 Air Quality Study (CRPAQS) using the UCD/CIT source-oriented air quality model – Part I. Base case model results. *Atmospheric Environment* 2008; **42**: 8954–66.
- 12 Ying Q, Lu J, Kaduwela A, Kleeman M. Modeling air quality during the California Regional PM10/PM2.5 Air Quality Study (CPRAQS) using the UCD/CIT Source Oriented Air Quality Model – Part II. Regional source apportionment of primary airborne particulate matter. *Atmospheric Environment* 2008; **42**: 8967–78.
- 13 Carter WPL, Heo G. Development of revised SAPRC aromatics mechanisms. *Atmospheric Environment* 2013; **77**: 404–14.
- 14 Hong S-Y, Noh Y, Dudhia J. A New Vertical Diffusion Package with an Explicit Treatment of Entrainment Processes. *Monthly Weather Review* 2006; **134**: 2318–41.
- 15 Xiu A, Pleim JE. Development of a Land Surface Model. Part I: Application in a Mesoscale Meteorological Model. *Journal of Applied Meteorology and Climatology* 2001; **40**: 192–209.

- 16 Su L, Fung JCH. Sensitivities of WRF-Chem to dust emission schemes and land surface properties in simulating dust cycles during springtime over East Asia. *Journal of Geophysical Research: Atmospheres* 2015; **120**: 11,215-11,230.
- 17 National Center for Health Statistics, United States Department of Health and Human Services (US DHHS), US Centers for Disease Control (CDC). Compressed Mortality File 1999-2013 with ICD-10 Codes on on CDC WONDER Online Database., in The current release for years 1999 - 2013 is compiled from: CMF 1999-2013, Series 20, No. 2S, 2014. 2014. [https://www.cdc.gov/nchs/data\\_access/cmf.htm](https://www.cdc.gov/nchs/data_access/cmf.htm) (accessed Jan 19, 2022).
- 18 Hu J, Zhang H, Chen S-H, *et al.* Predicting Primary PM<sub>2.5</sub> and PM<sub>0.1</sub> Trace Composition for Epidemiological Studies in California. *Environ Sci Technol* 2014; **48**: 4971–9.
- 19 McDonald BC, McBride ZC, Martin EW, Harley RA. High-resolution mapping of motor vehicle carbon dioxide emissions. *Journal of Geophysical Research: Atmospheres* 2014; **119**: 5283–98.
- 20 Brondfield MN, Hutyra LR, Gately CK, Raciti SM, Peterson SA. Modeling and validation of on-road CO<sub>2</sub> emissions inventories at the urban regional scale. *Environmental Pollution* 2012; **170**: 113–23.
- 21 California Air Resource Board. California Air Resource Board SIP 2016 Emissions Projection Data. [https://www.arb.ca.gov/app/emsinv/2017/emssumcat\\_query.php?F\\_YR=2012&F\\_DIV=-4&F\\_SEASON=A&SP=SIP105ADJ&F\\_AREA=CA#AREAWIDE](https://www.arb.ca.gov/app/emsinv/2017/emssumcat_query.php?F_YR=2012&F_DIV=-4&F_SEASON=A&SP=SIP105ADJ&F_AREA=CA#AREAWIDE) (accessed Dec 7, 2020).
- 22 Almaraz M, Bai E, Wang C, *et al.* Agriculture is a major source of NO<sub>x</sub> pollution in California. *Science Advances* 2018; **4**. DOI:10.1126/sciadv.aao3477.
- 23 Kleeman M, Anikender K, Abhishek D. Investigative Modeling of PM<sub>2.5</sub> Episodes in the San Joaquin Valley Air Basin during Recent Years. California Air Resources Board, 2019.
- 24 Guenther AB, Jiang X, Heald CL, *et al.* The Model of Emissions of Gases and Aerosols from Nature version 2.1 (MEGAN2.1): an extended and updated framework for modeling biogenic emissions. *Geoscientific Model Development* 2012; **5**: 1471–92.
- 25 Giglio L, Randerson JT, van der Werf GR. Analysis of daily, monthly, and annual burned area using the fourth-generation global fire emissions database (GFED4). *Journal of Geophysical Research: Biogeosciences* 2013; **118**: 317–28.
- 26 Paugam R, Wooster M, Freitas S, Val Martin M. A review of approaches to estimate wildfire plume injection height within large-scale atmospheric chemical transport models. *Atmospheric Chemistry and Physics* 2016; **16**: 907–25.
- 27 van der Werf GR, Randerson JT, Giglio L, *et al.* Global fire emissions estimates during 1997–2016. *Earth System Science Data* 2017; **9**: 697–720.
- 28 Hays MD, Fine PM, Geron CD, Kleeman MJ, Gullett BK. Open burning of agricultural biomass: Physical and chemical properties of particle-phase emissions. *Atmospheric Environment* 2005; **39**: 6747–64.
